# Supplementary material
Source: MDPI journal article supplement (https://www.mdpi.com/2624-8549/3/4/90)
Supplement: s1 [file s1 › chemistry-1405647-supplementary updated.pdf]

## Supplementary Materials

# A practical, laboratory-scale synthesis of all the isomeric forms of the terpene linalool oxide

Stefano Serra <sup>a,\*</sup>, Davide De Simeis <sup>a</sup> and Sara Papili <sup>b</sup>

<sup>a</sup> Consiglio Nazionale delle Ricerche (C.N.R.) Istituto di Scienze e Tecnologie Chimiche, Via Mancinelli 7, 20131 Milano, Italy

<sup>b</sup> Dipartimento di Scienze Farmaceutiche, Università degli Studi di Milano; Via L. Mangiagalli 25, 20133 Milano, Italy Tel.: +39-02-2399 3076

Fax: +39-02-2399 3180

E-Mail: stefano.serra@cnr.it or stefano.serra@polimi.it

### 1. Study of the benzylation of the crude mixture of the linalool oxide isomers obtained from linalool.

A sample of a mixture of linalool oxide isomers (1.7 g, 10 mMol, furanoid/pyranoid ratio = 81:19) was dissolved in dry CH<sub>2</sub>Cl<sub>2</sub> (4 mL) and was treated under stirring with 1 mL of pyridine followed by the addition of BzCl, according to the experimental conditions indicated in Table 1. Hence, the reaction was poured into a mixture of crushed ice (50 g) and a saturated solution of NaHCO<sub>3</sub> aq. (50 mL). The resulting mixture was extracted with CH<sub>2</sub>Cl<sub>2</sub> (2 x 50 mL) and the combined organic phases were dried (Na<sub>2</sub>SO<sub>4</sub>) and concentrated under reduced pressure. The residue was then analysed by GC-MS.

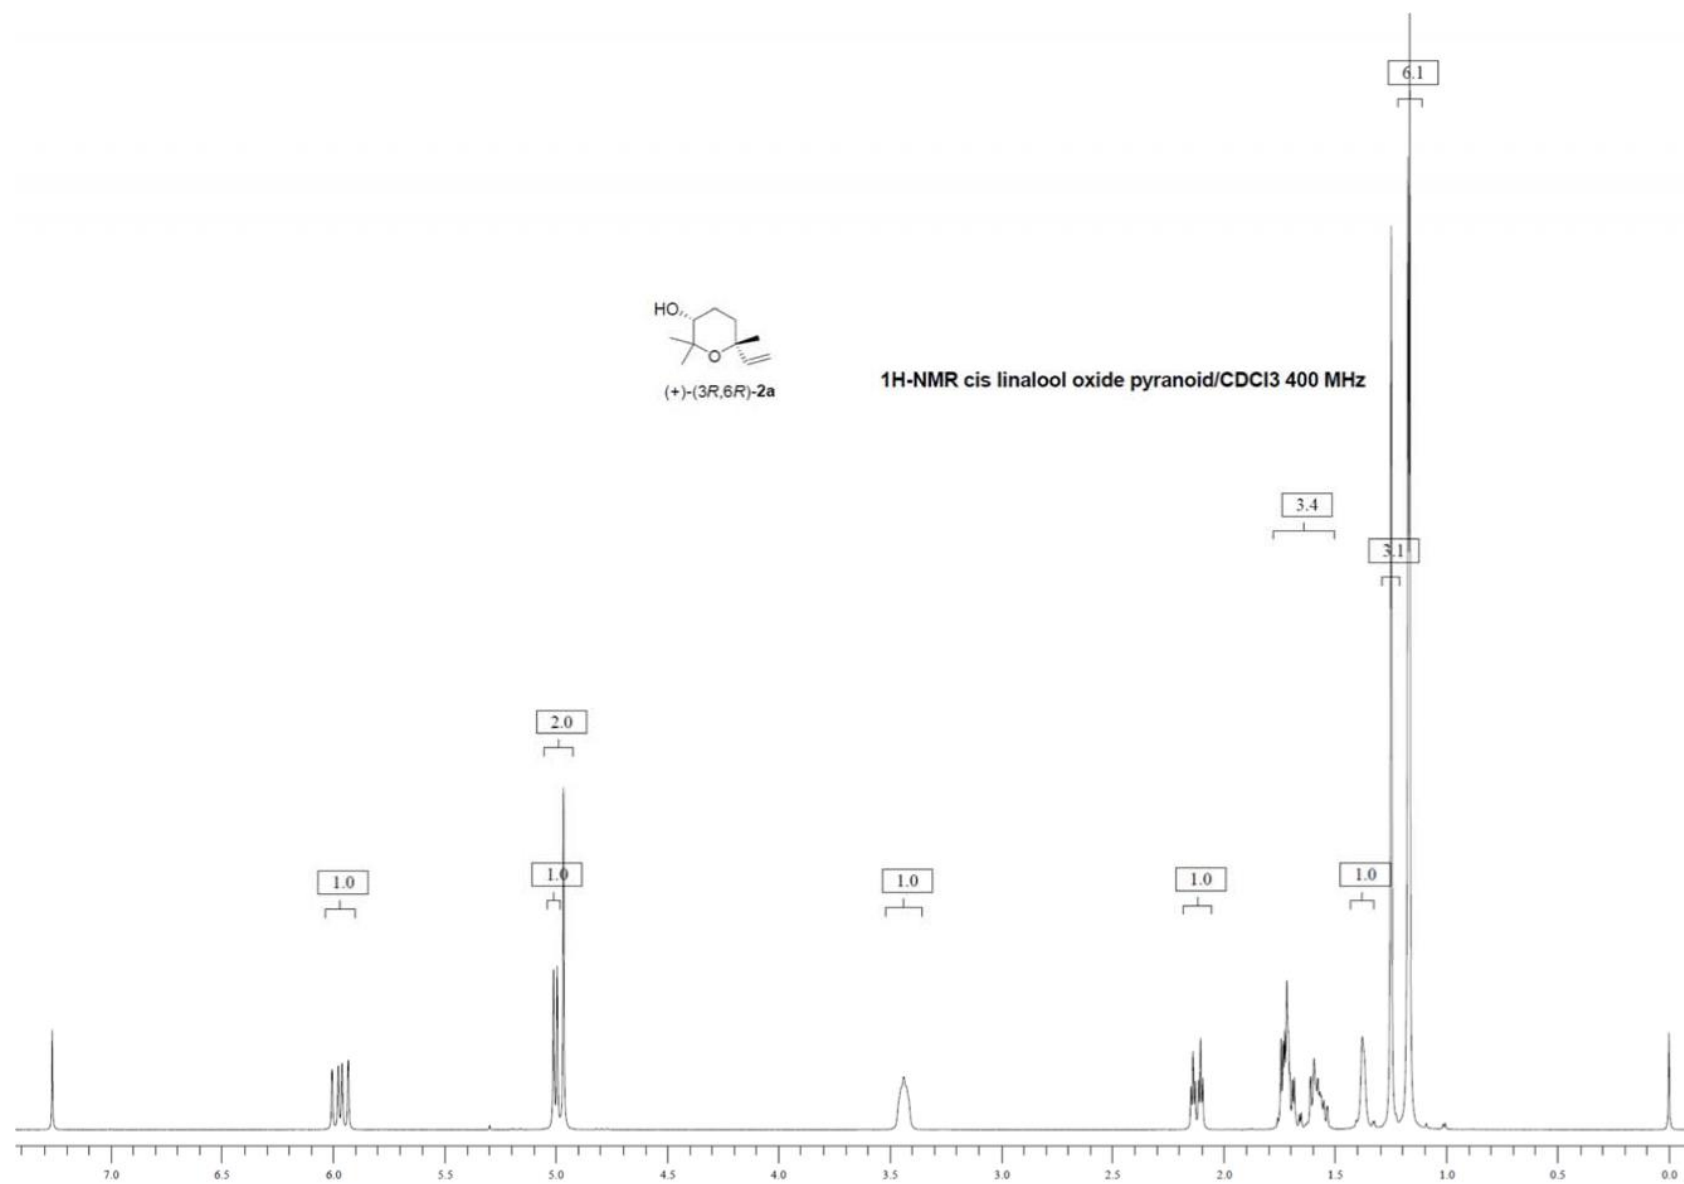

**Figure S1.** <sup>1</sup>H-NMR of the *cis* linalool oxide (pyranoid).

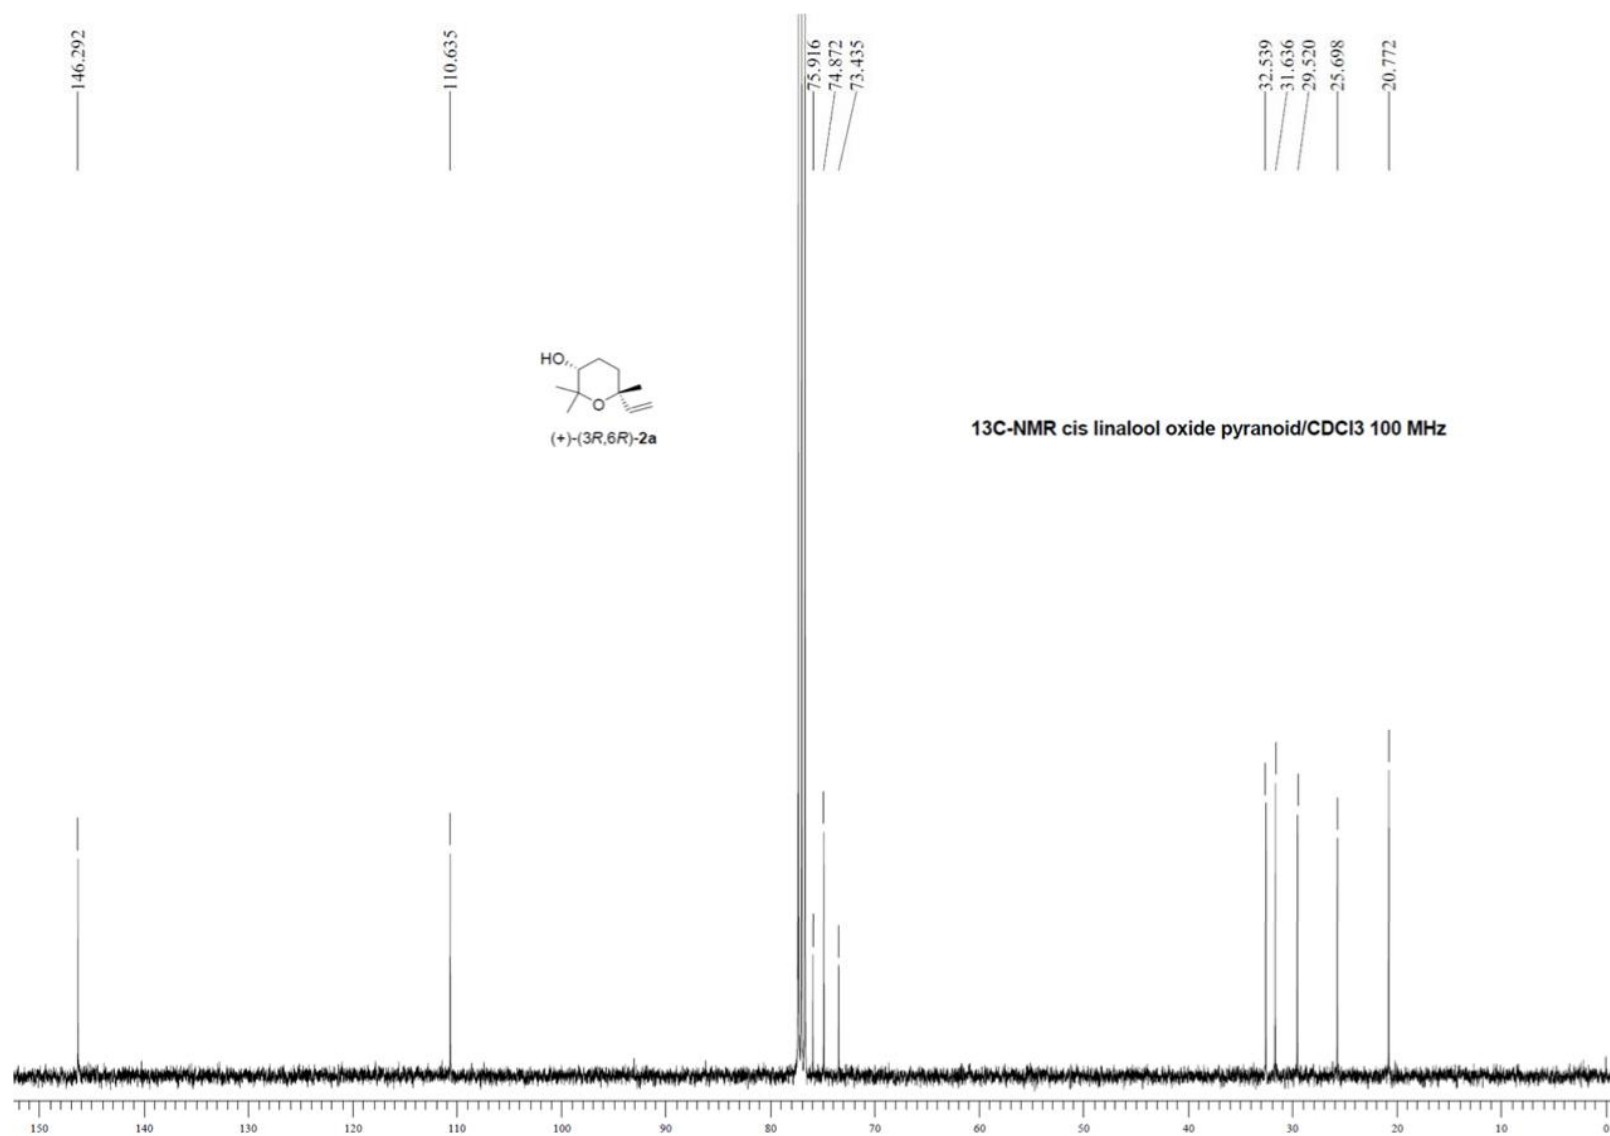

Figure S2.  $^{13}\text{C}$ -NMR of the *cis* linalool oxide (pyranoid).

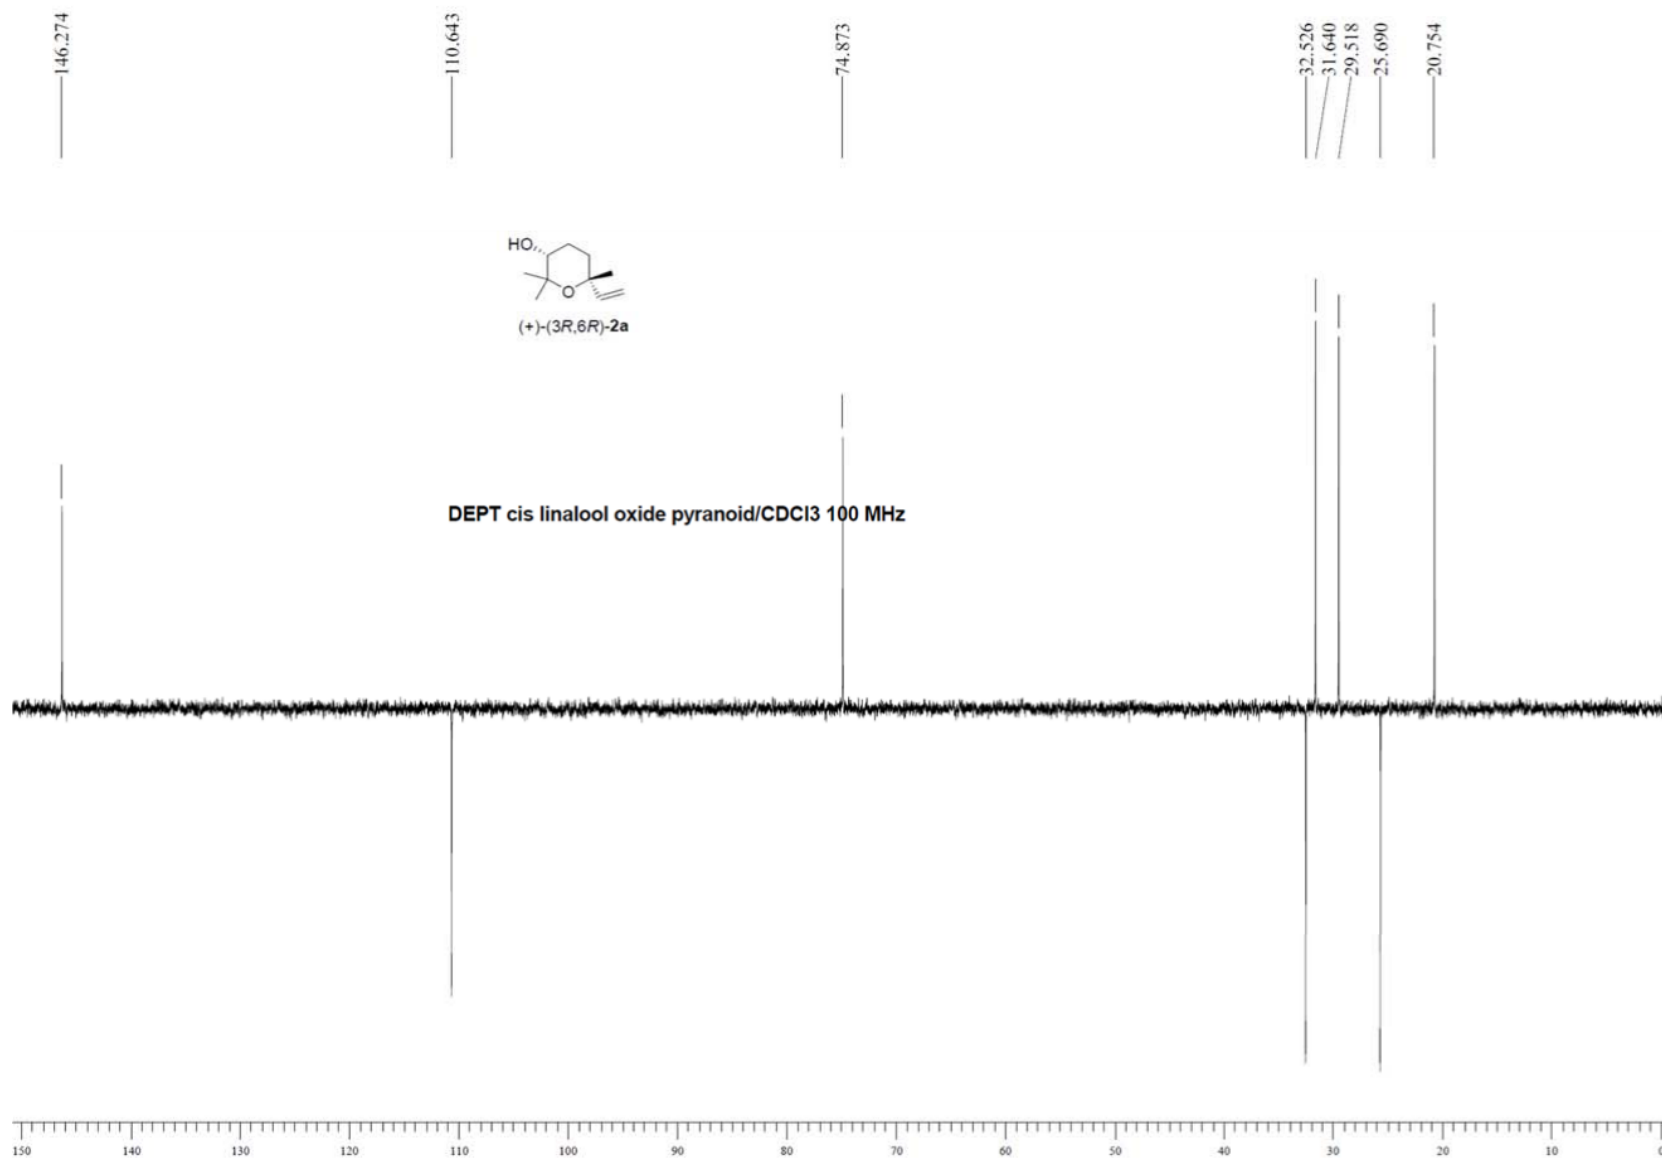

Figure S3. DEPT experiment of the *cis* linalool oxide (pyranoid).

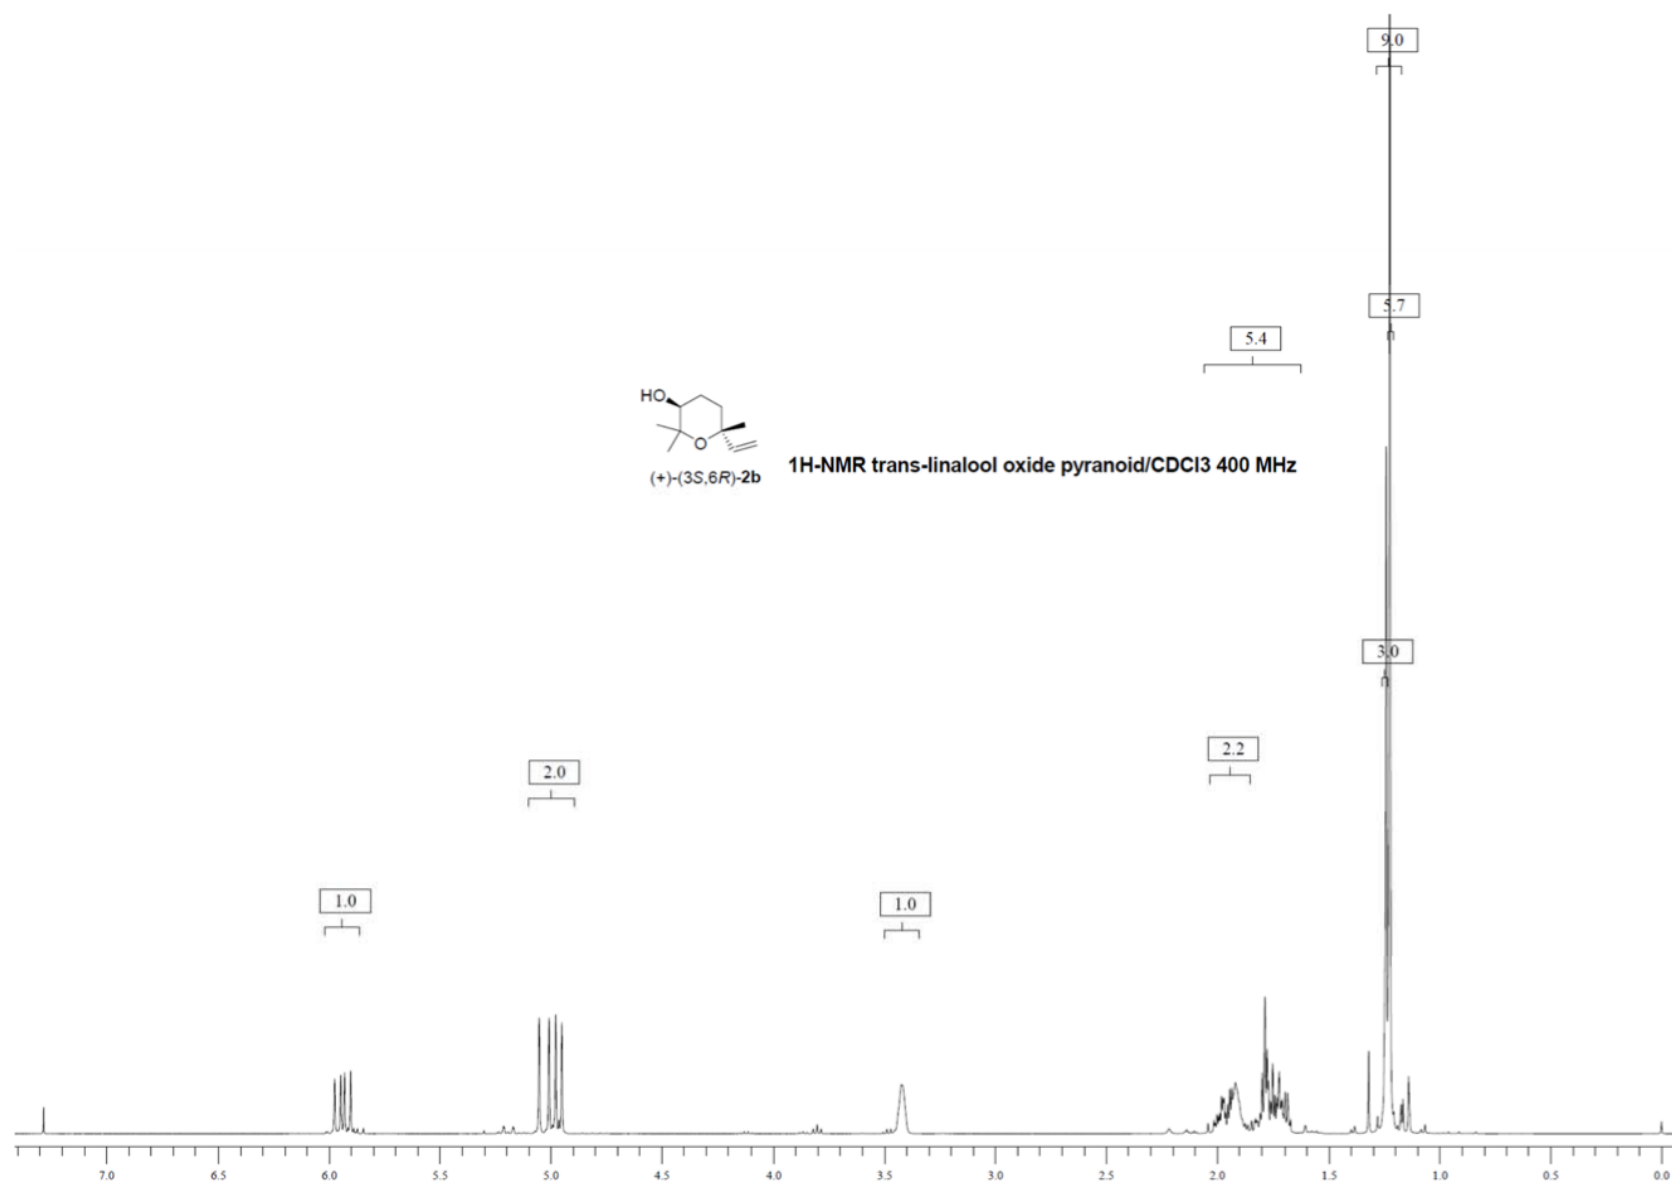

**Figure S4.** <sup>1</sup>H-NMR of the *trans* linalool oxide (pyranoid).

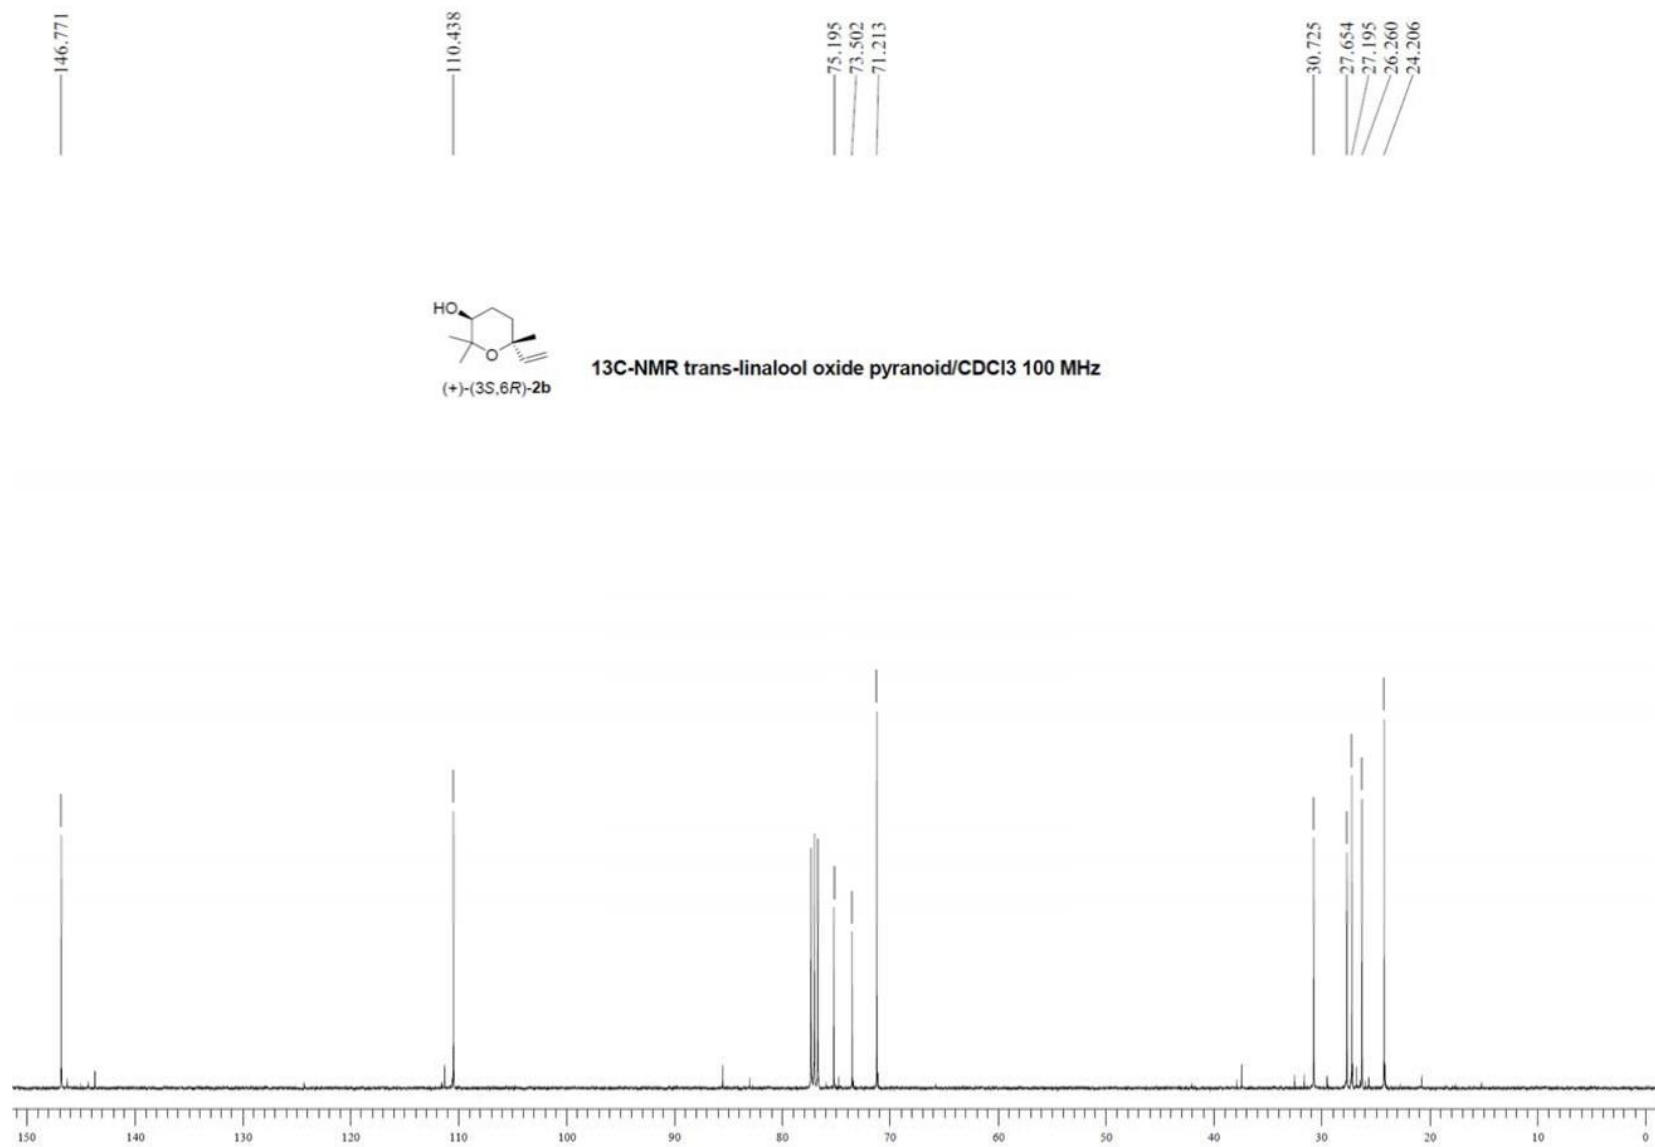

**Figure S5.** <sup>13</sup>C-NMR of the *trans* linalool oxide (pyranoid).

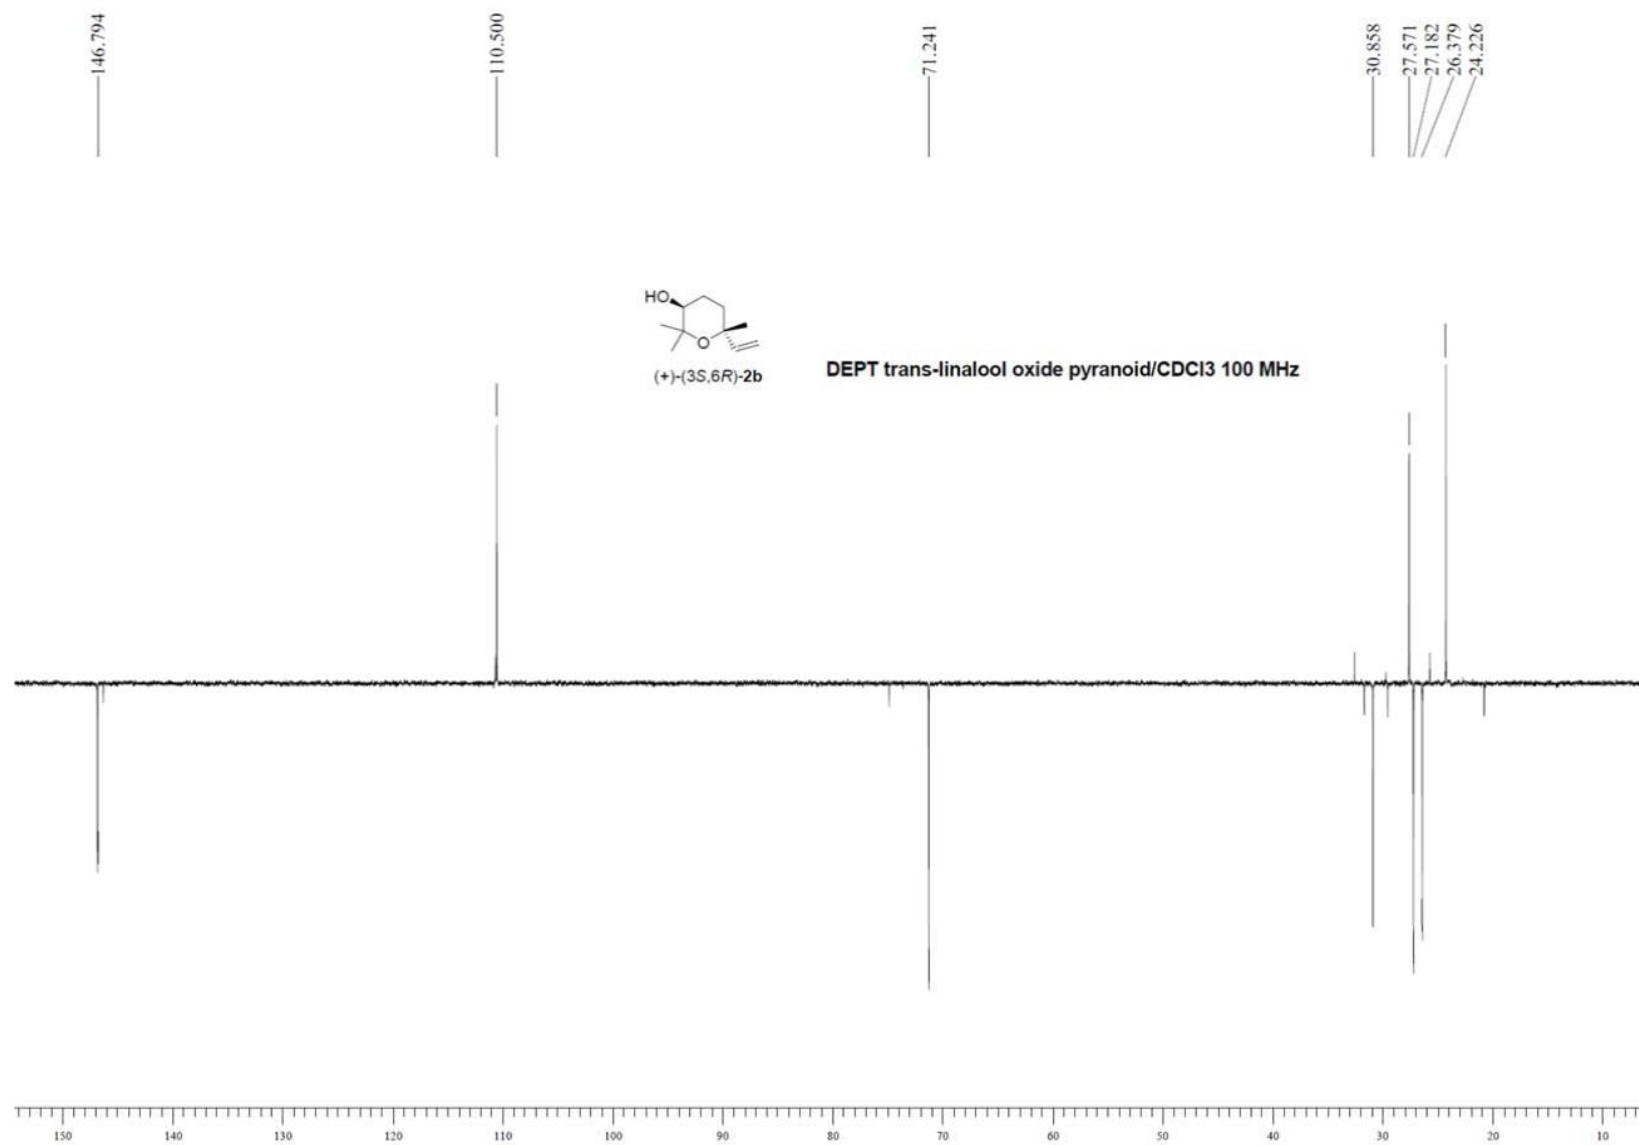

Figure S6. DEPT experiment of the *trans* linalool oxide (pyranoid).

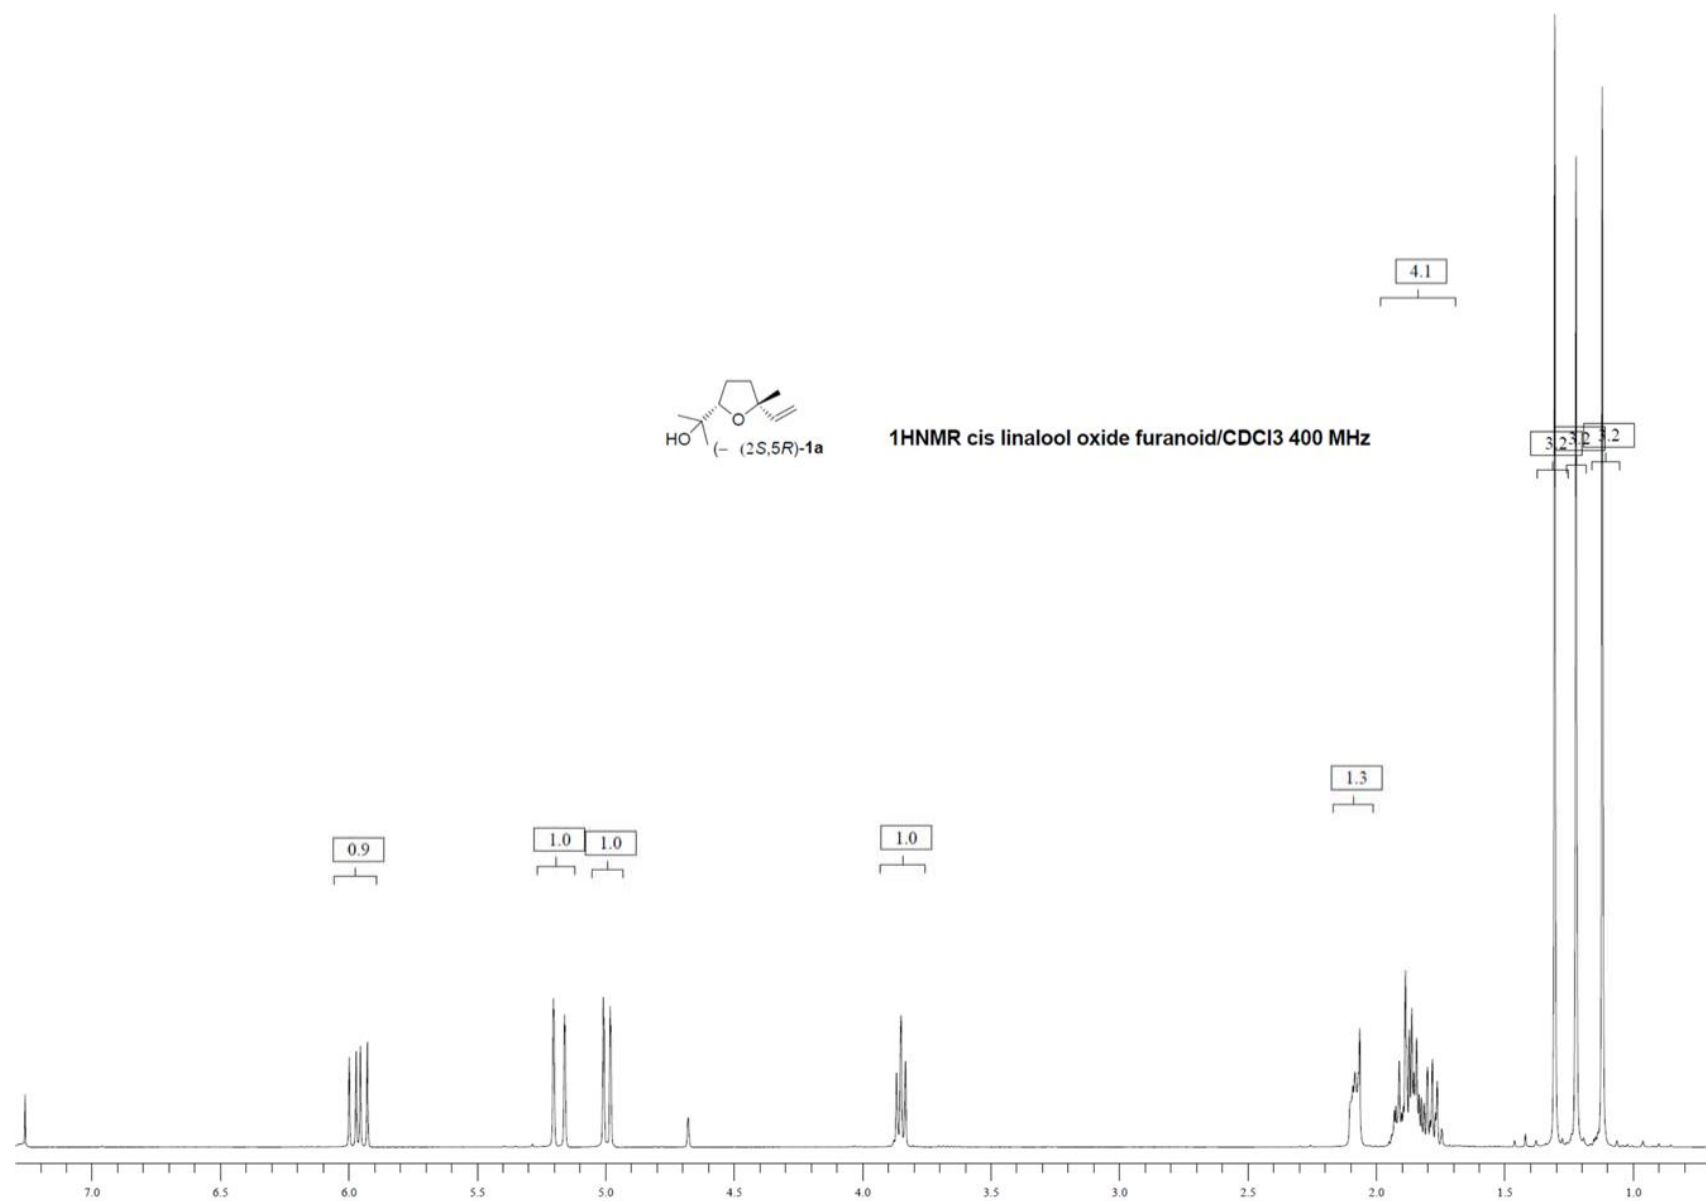

**Figure S7.** <sup>1</sup>H-NMR of the *cis* linalool oxide (furanoid).

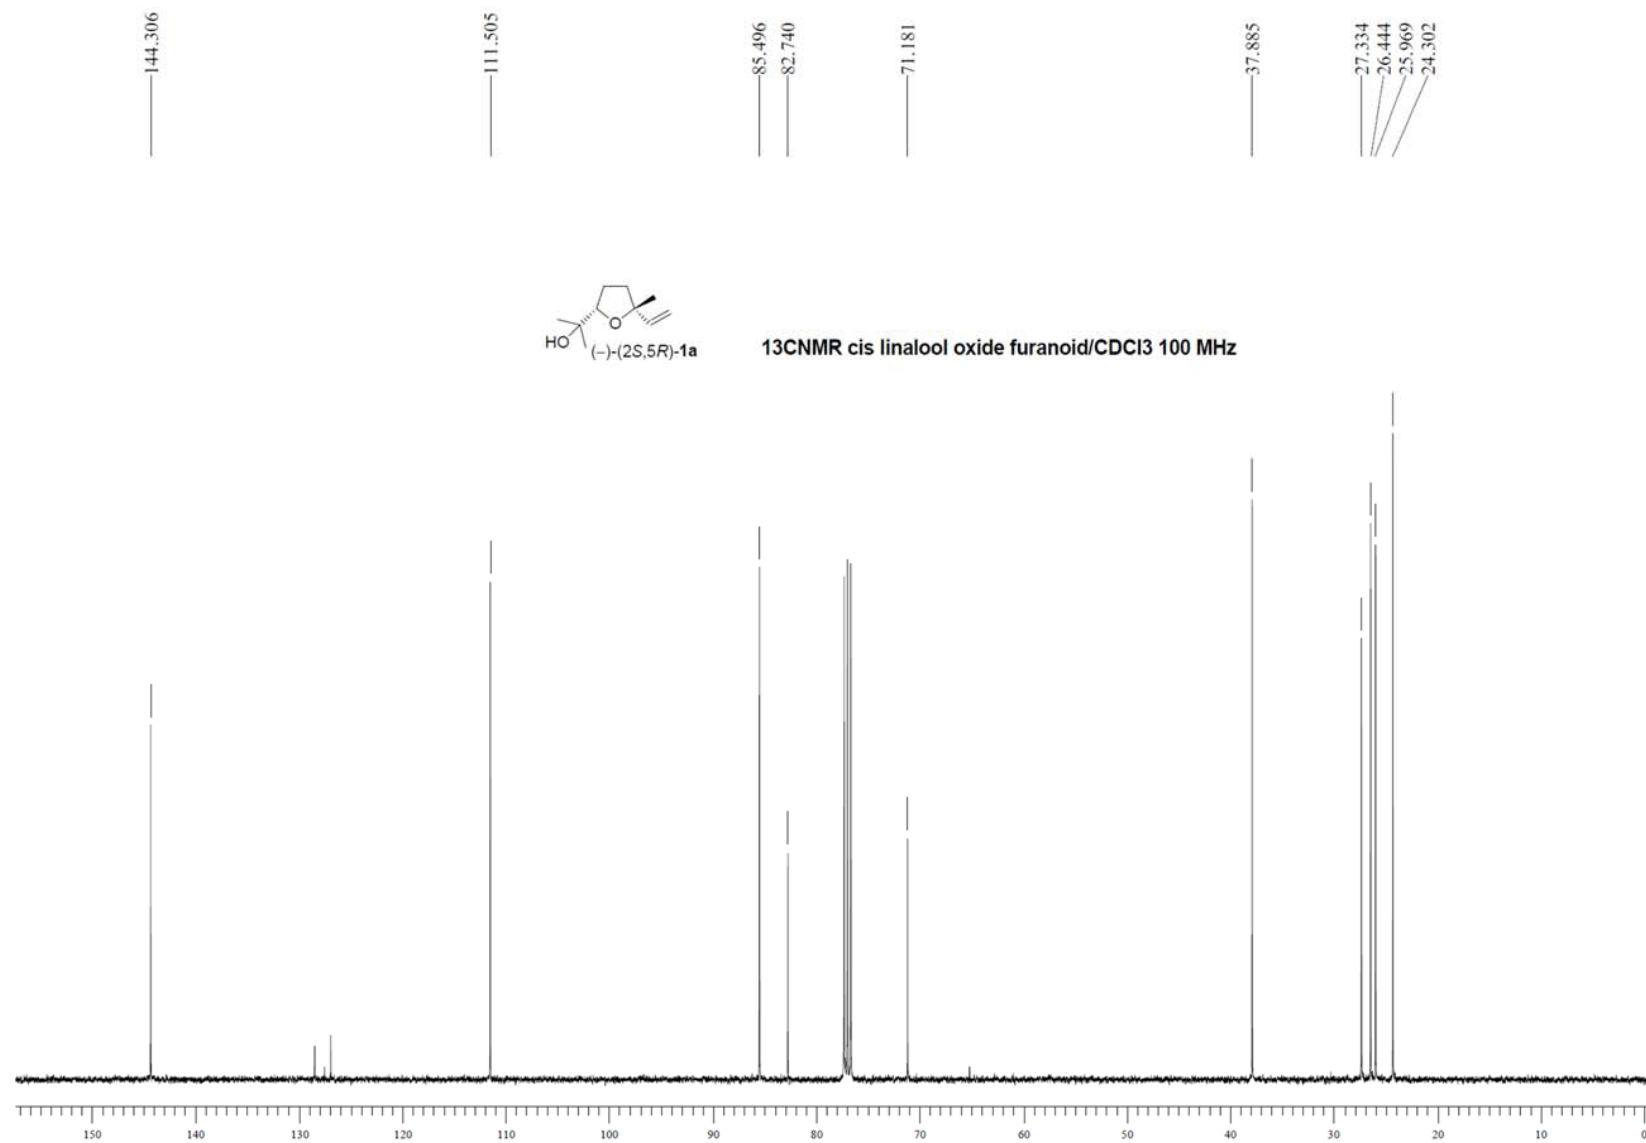

**Figure S8.** <sup>13</sup>C-NMR of the *cis* linalool oxide (furanoid).

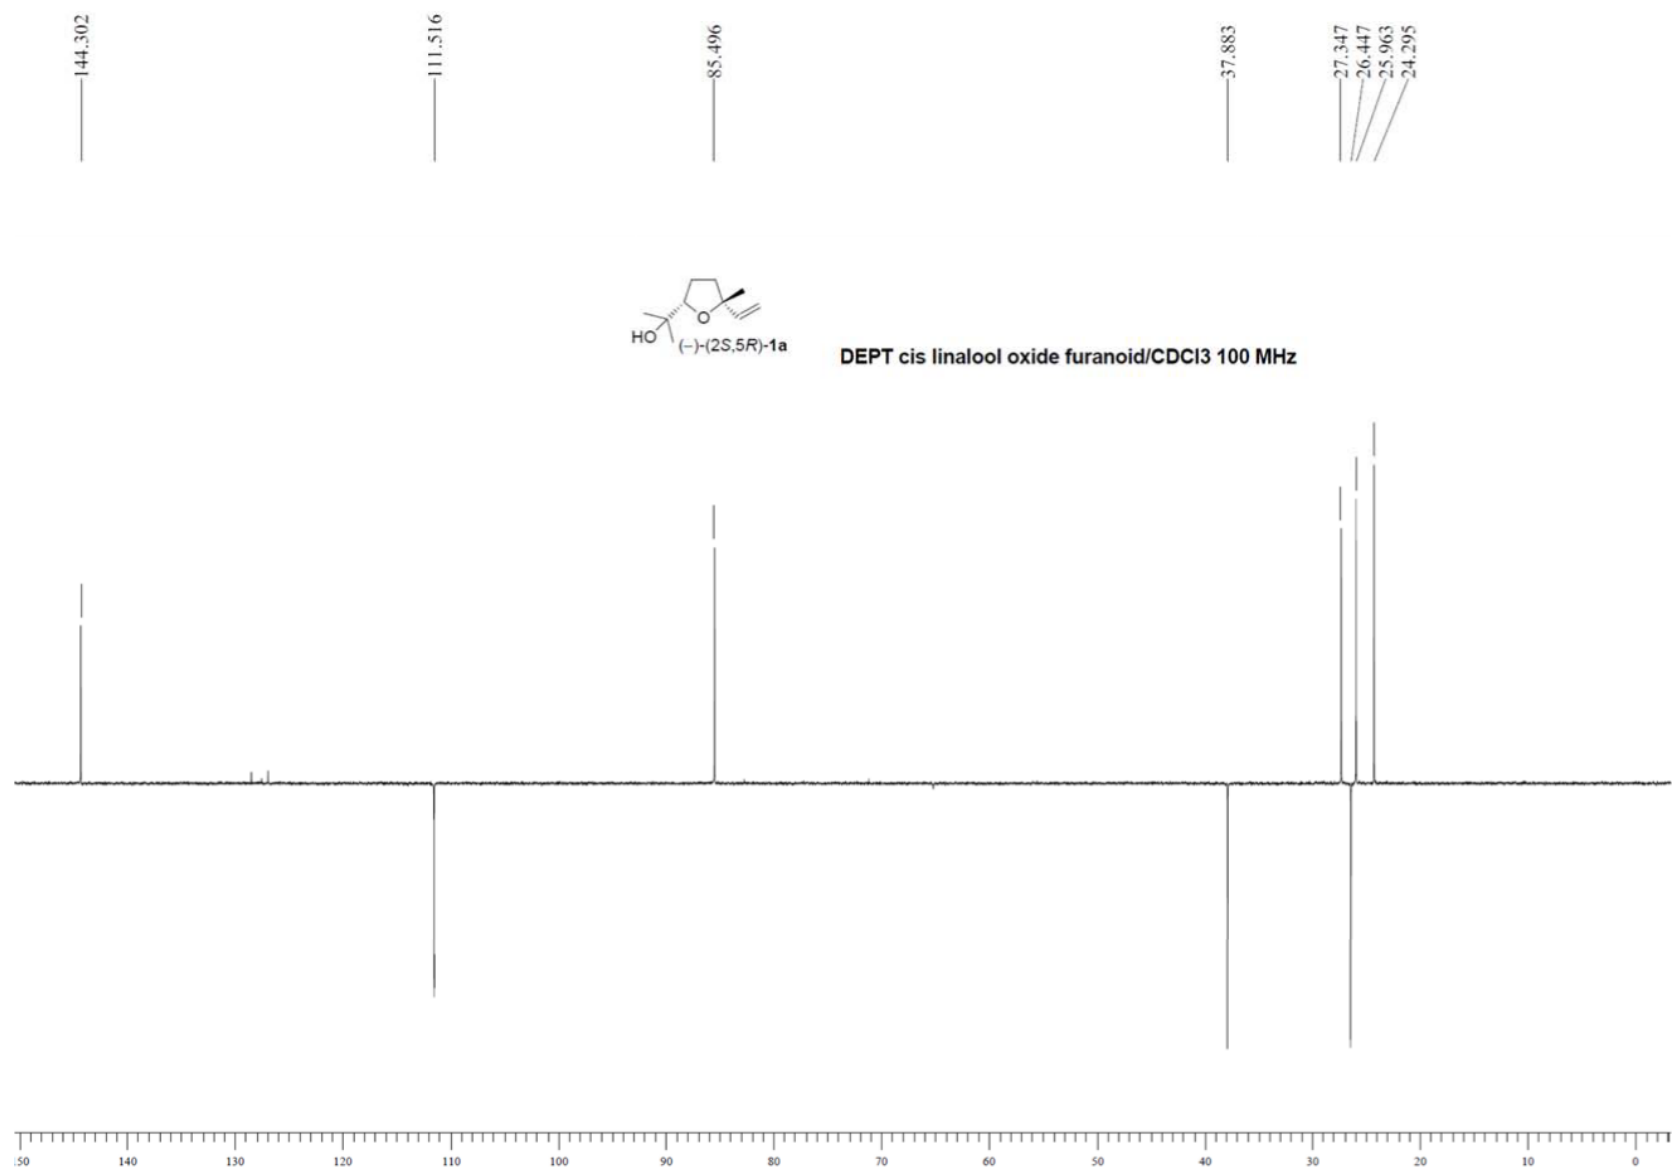

**Figure S9.** DEPT experiment of the *cis* linalool oxide (furanoid)Figure S10: <sup>1</sup>H-NMR of the *trans* linalool oxide (furanoid).

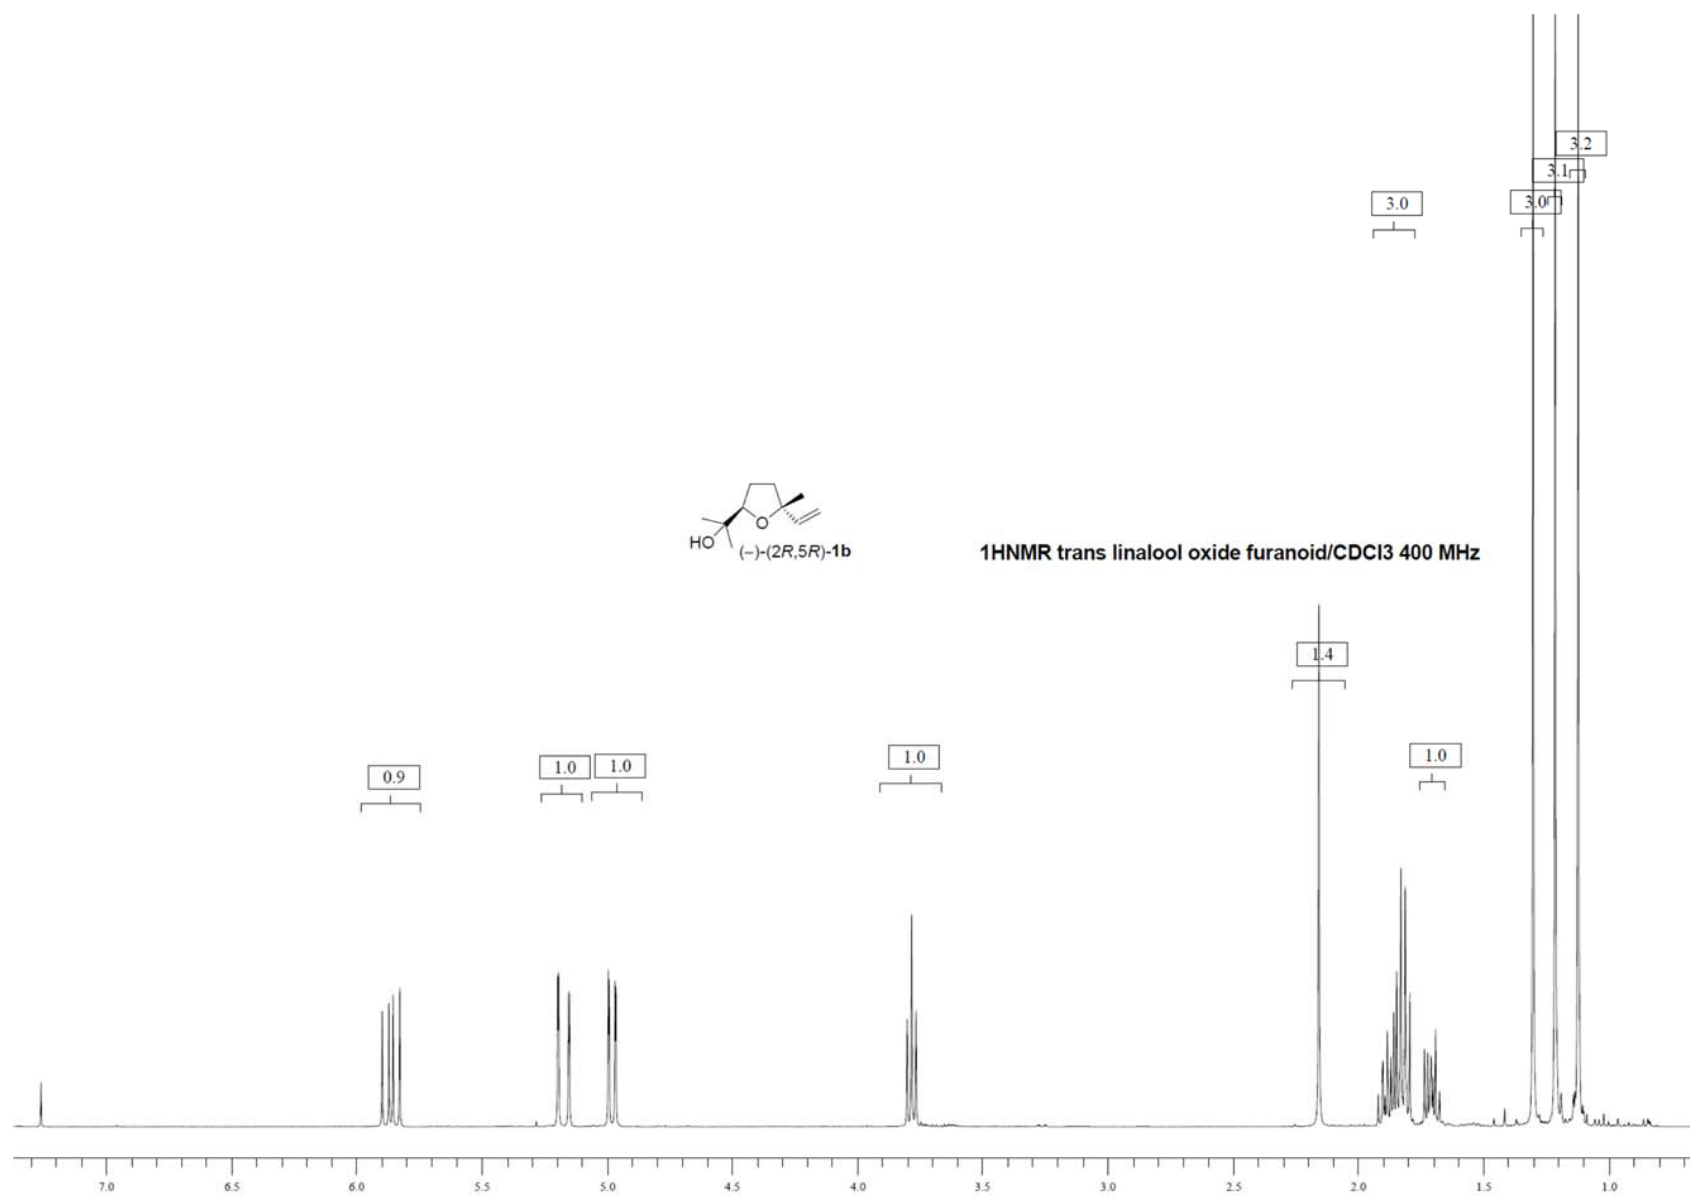

**Figure S10.** <sup>1</sup>H-NMR of the trans linalool oxide (furanoid)

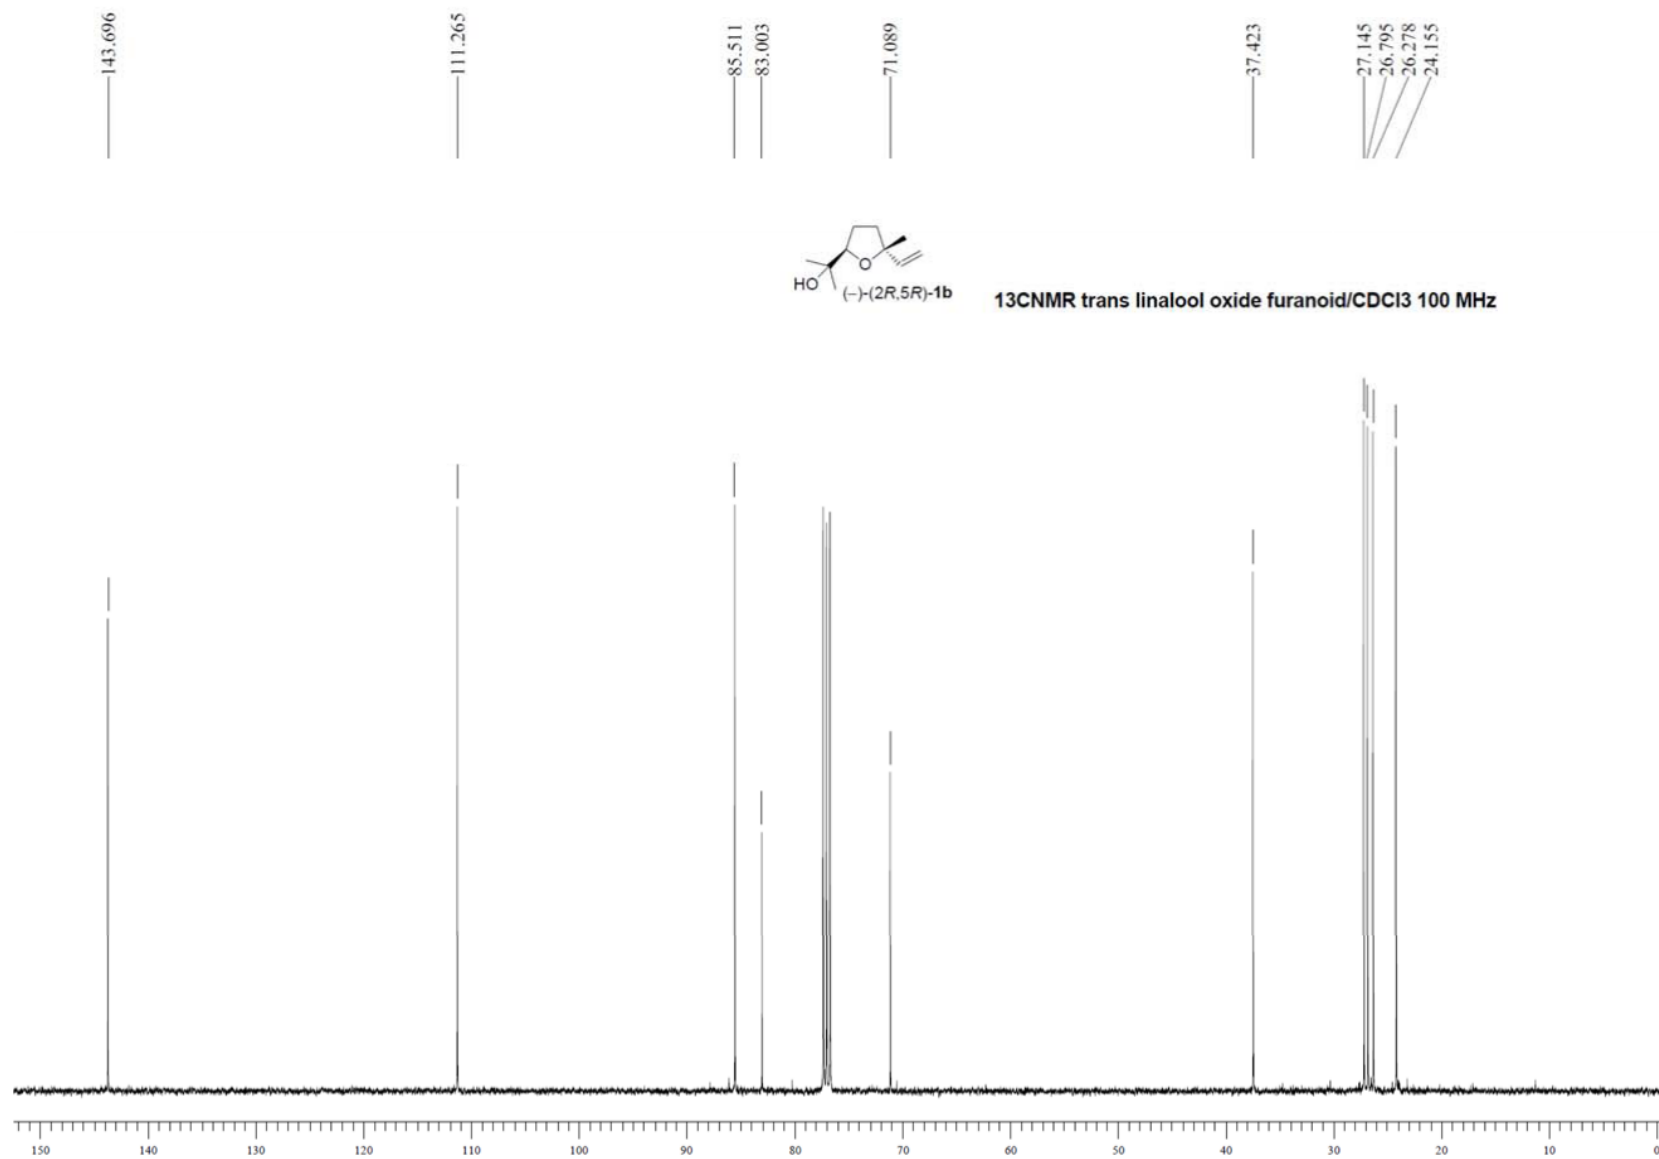

**Figure S11.** <sup>13</sup>C-NMR of the *trans* linalool oxide (furanoid).

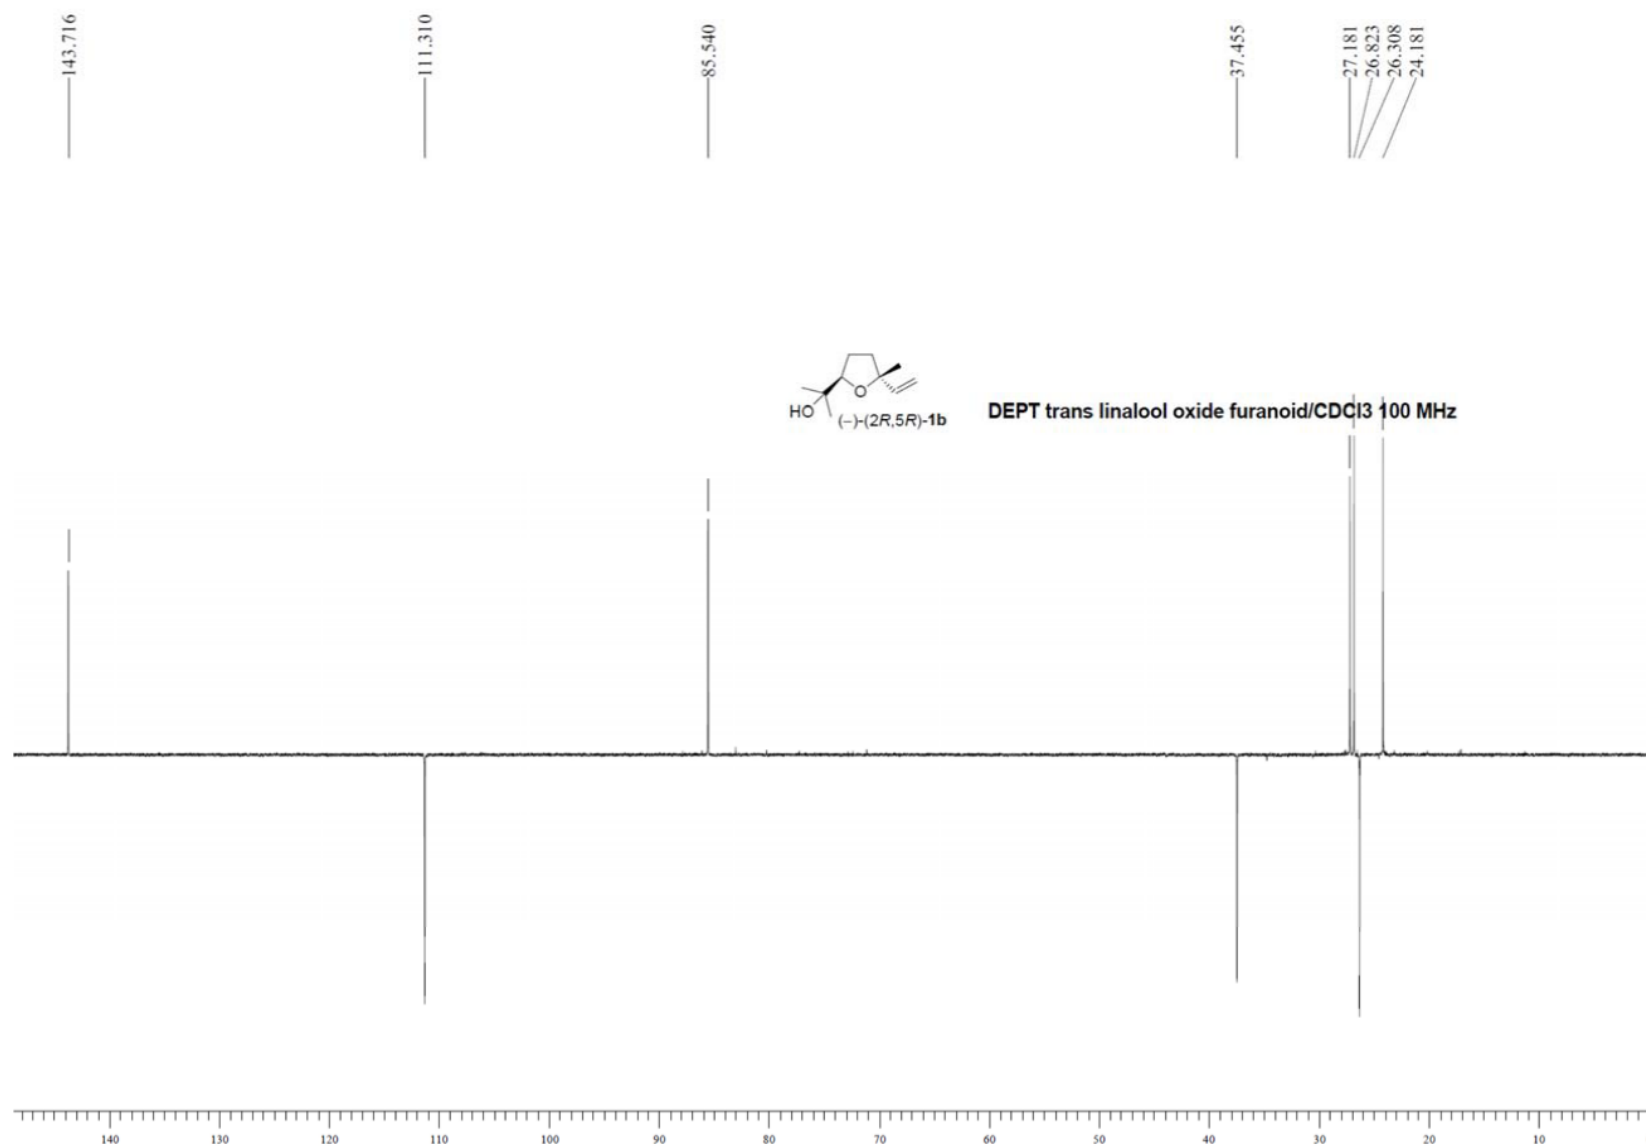

**Figure S12.** DEPT experiment of the *trans* linalool oxide (furanoid).

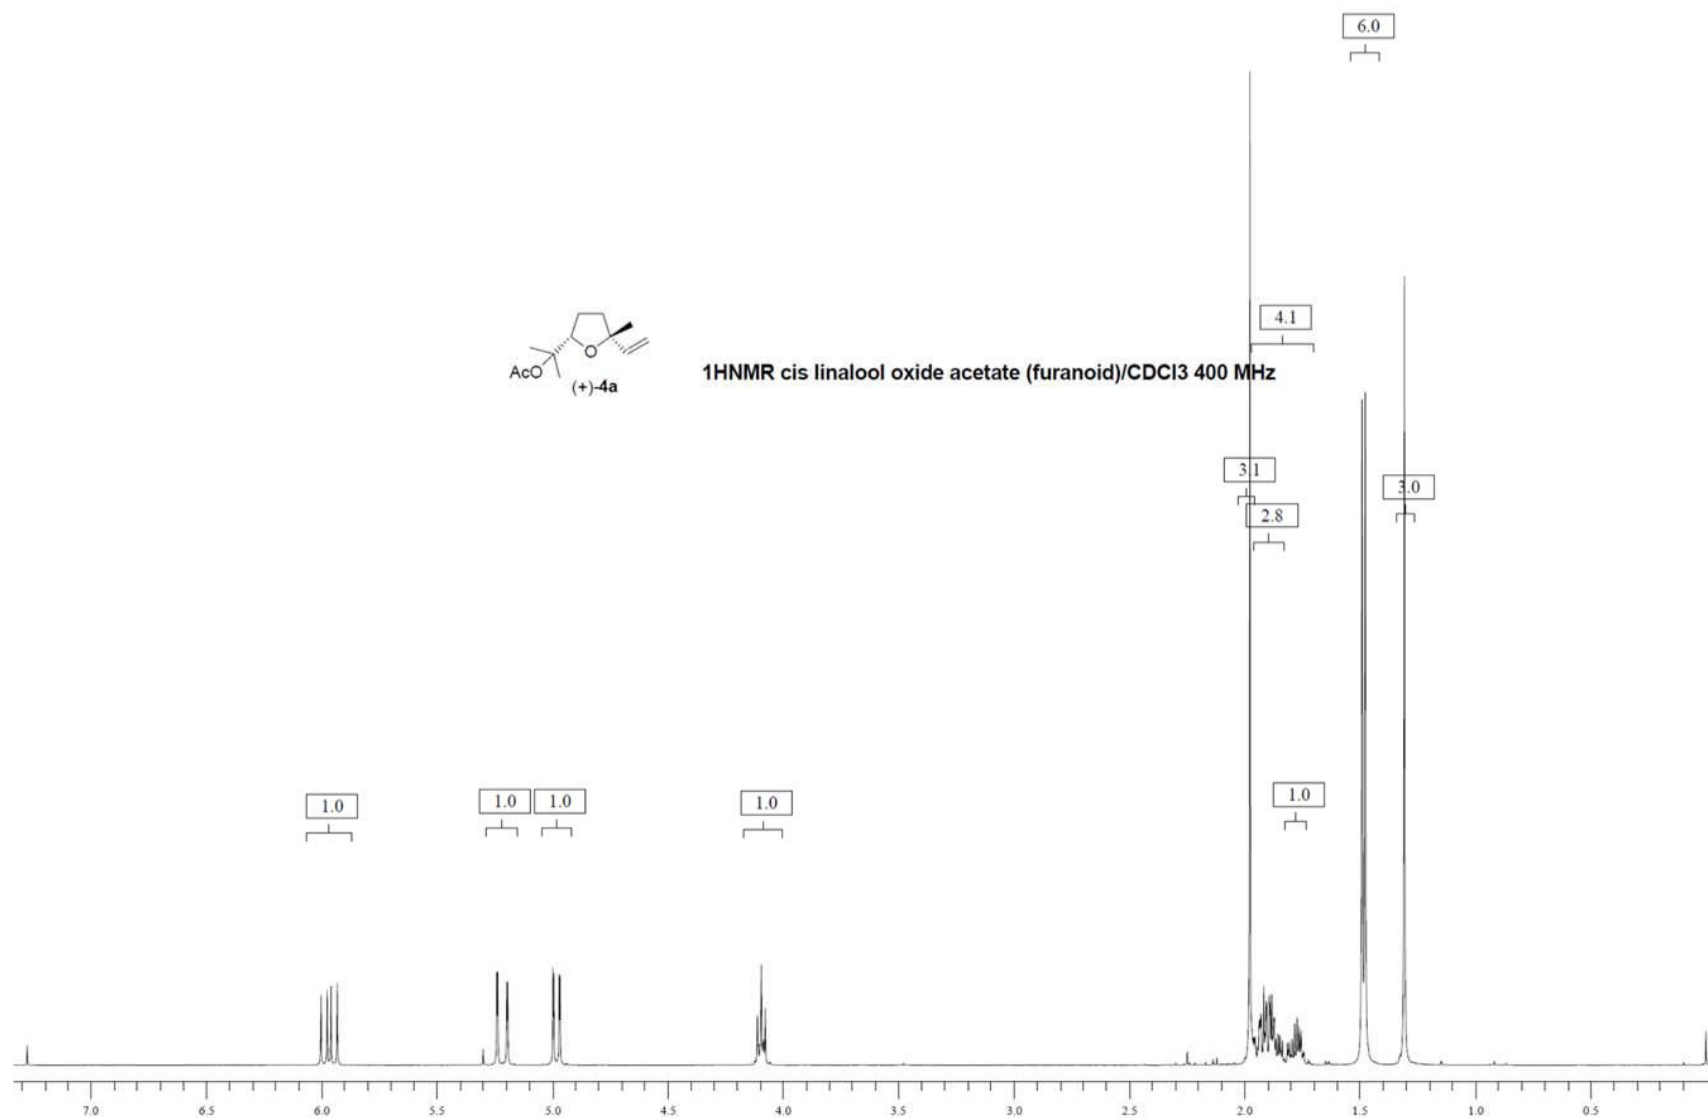

**Figure S13.** <sup>1</sup>H-NMR of the *cis* linalool oxide acetate (furanoid).

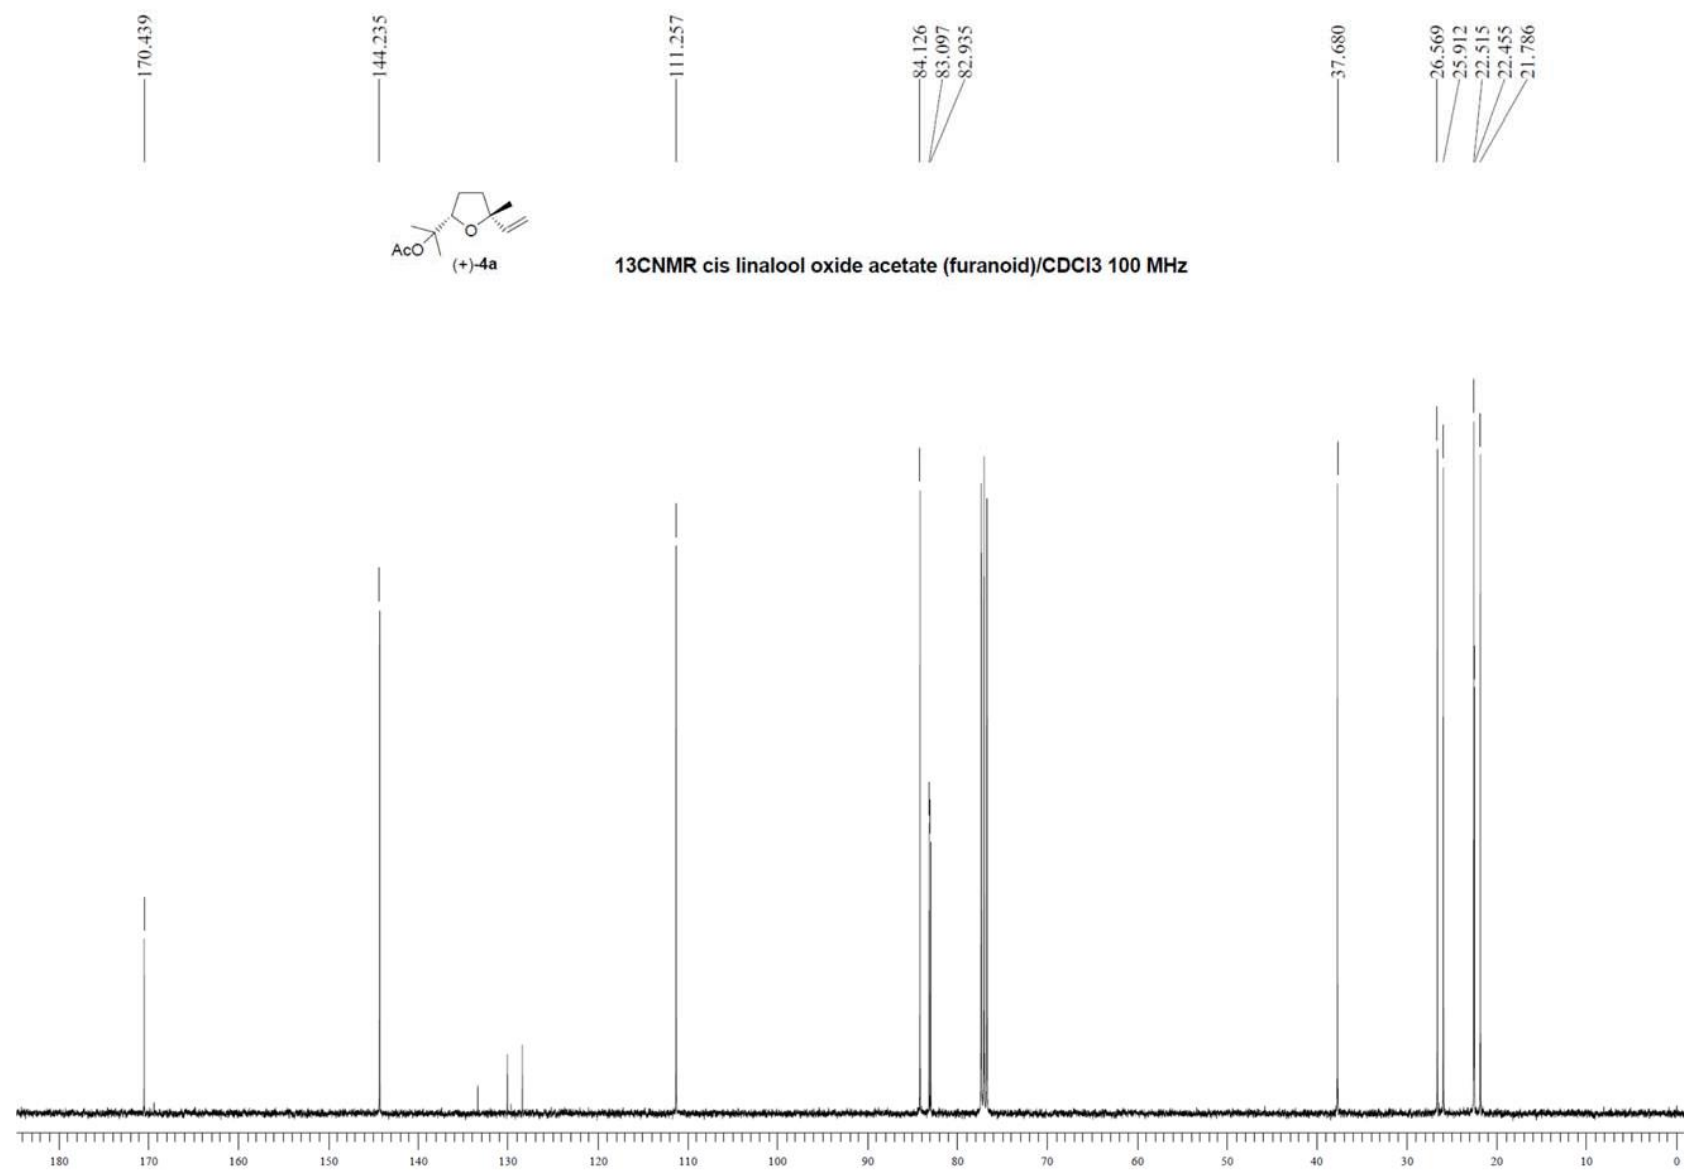

**Figure S14.** <sup>13</sup>C-NMR of the *cis* linalool oxide acetate (furanoid).

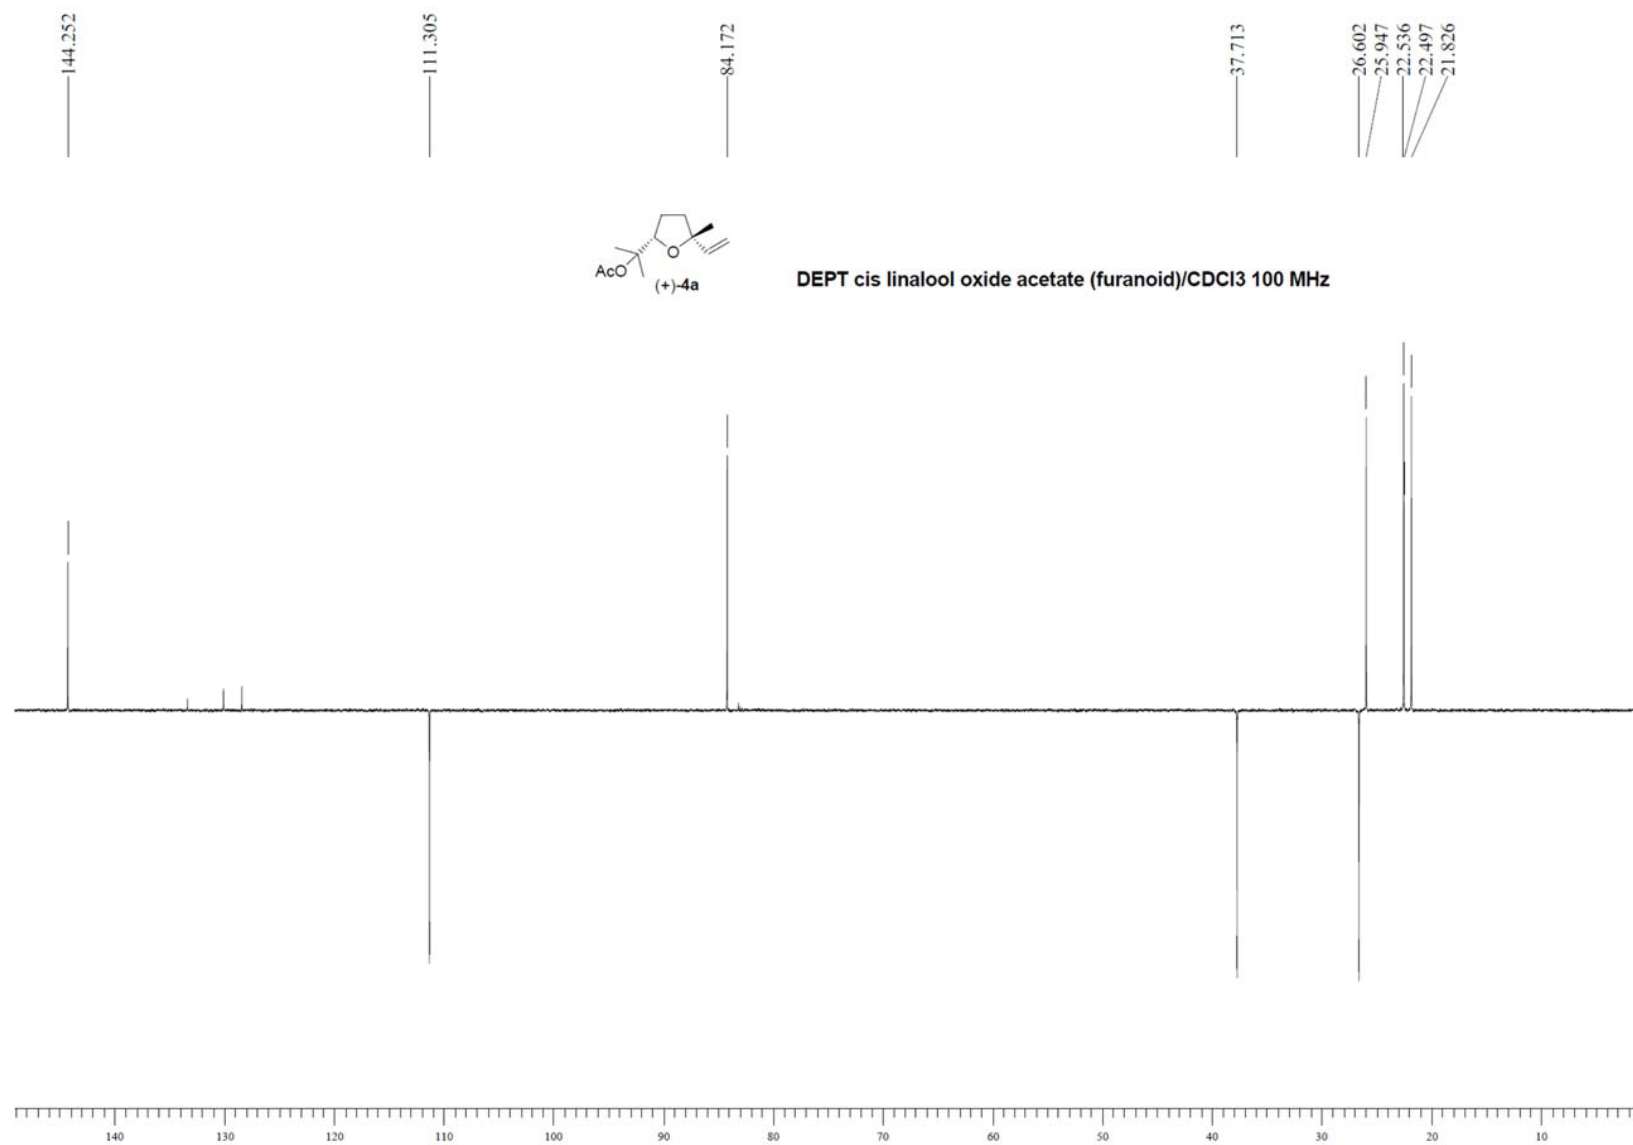

Figure S15. DEPT experiment of the *cis* linalool oxide acetate (furanoid).

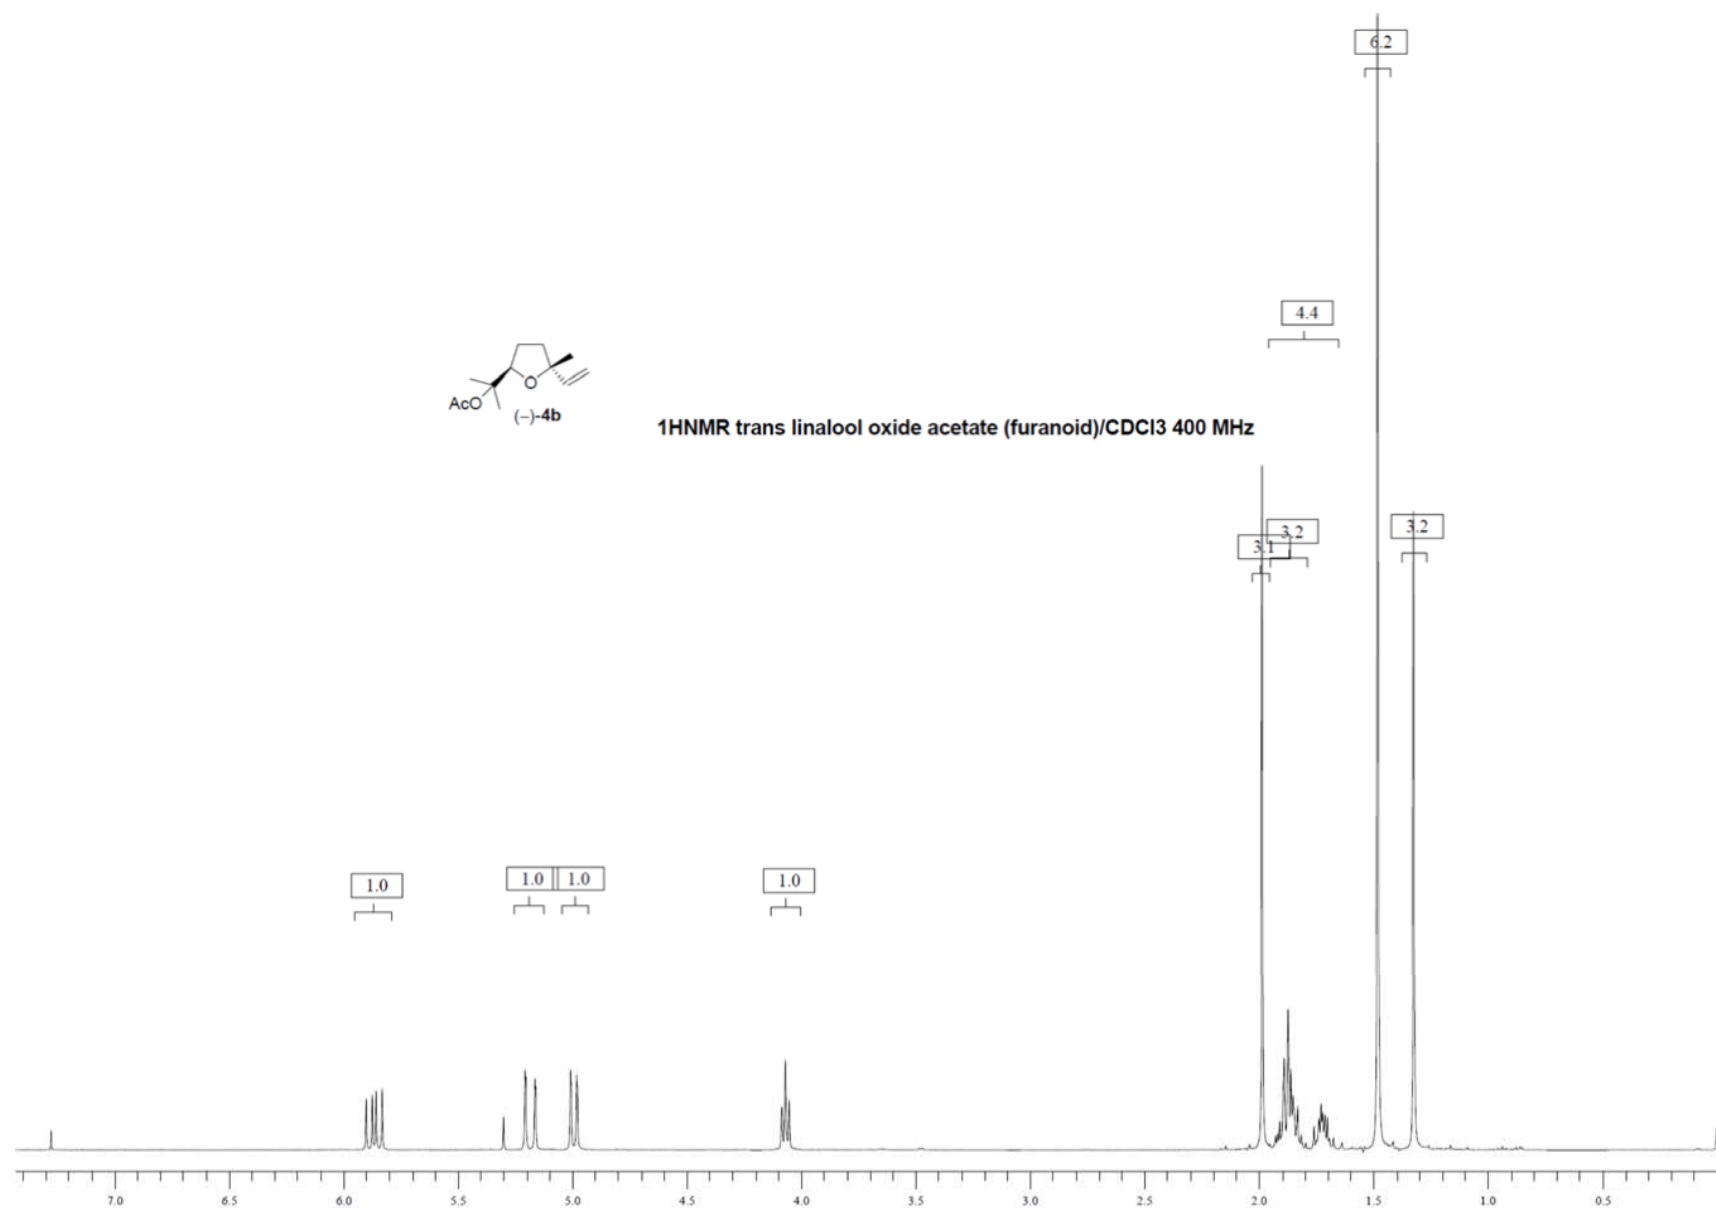

**Figure S16.** <sup>1</sup>H-NMR of the *trans* linalool oxide acetate (furanoid).

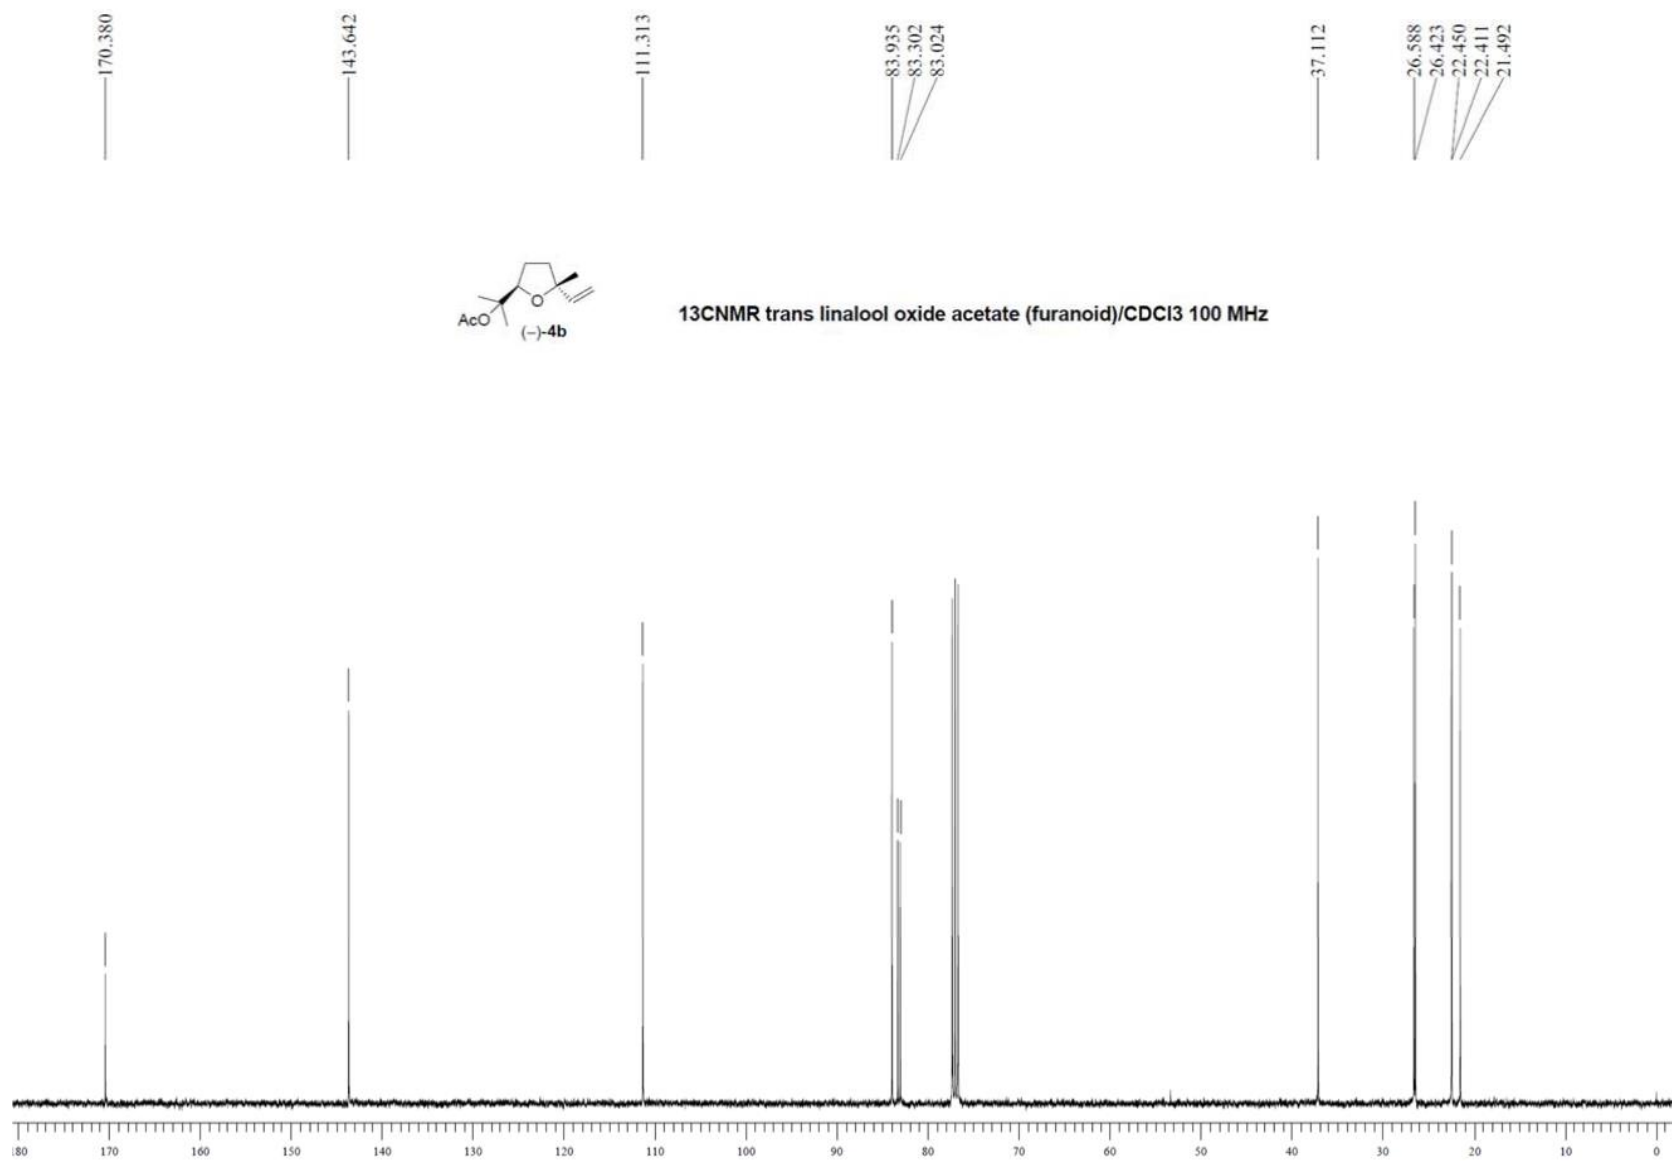

Figure S17. <sup>13</sup>C-NMR of the *trans* linalool oxide acetate (furanoid).

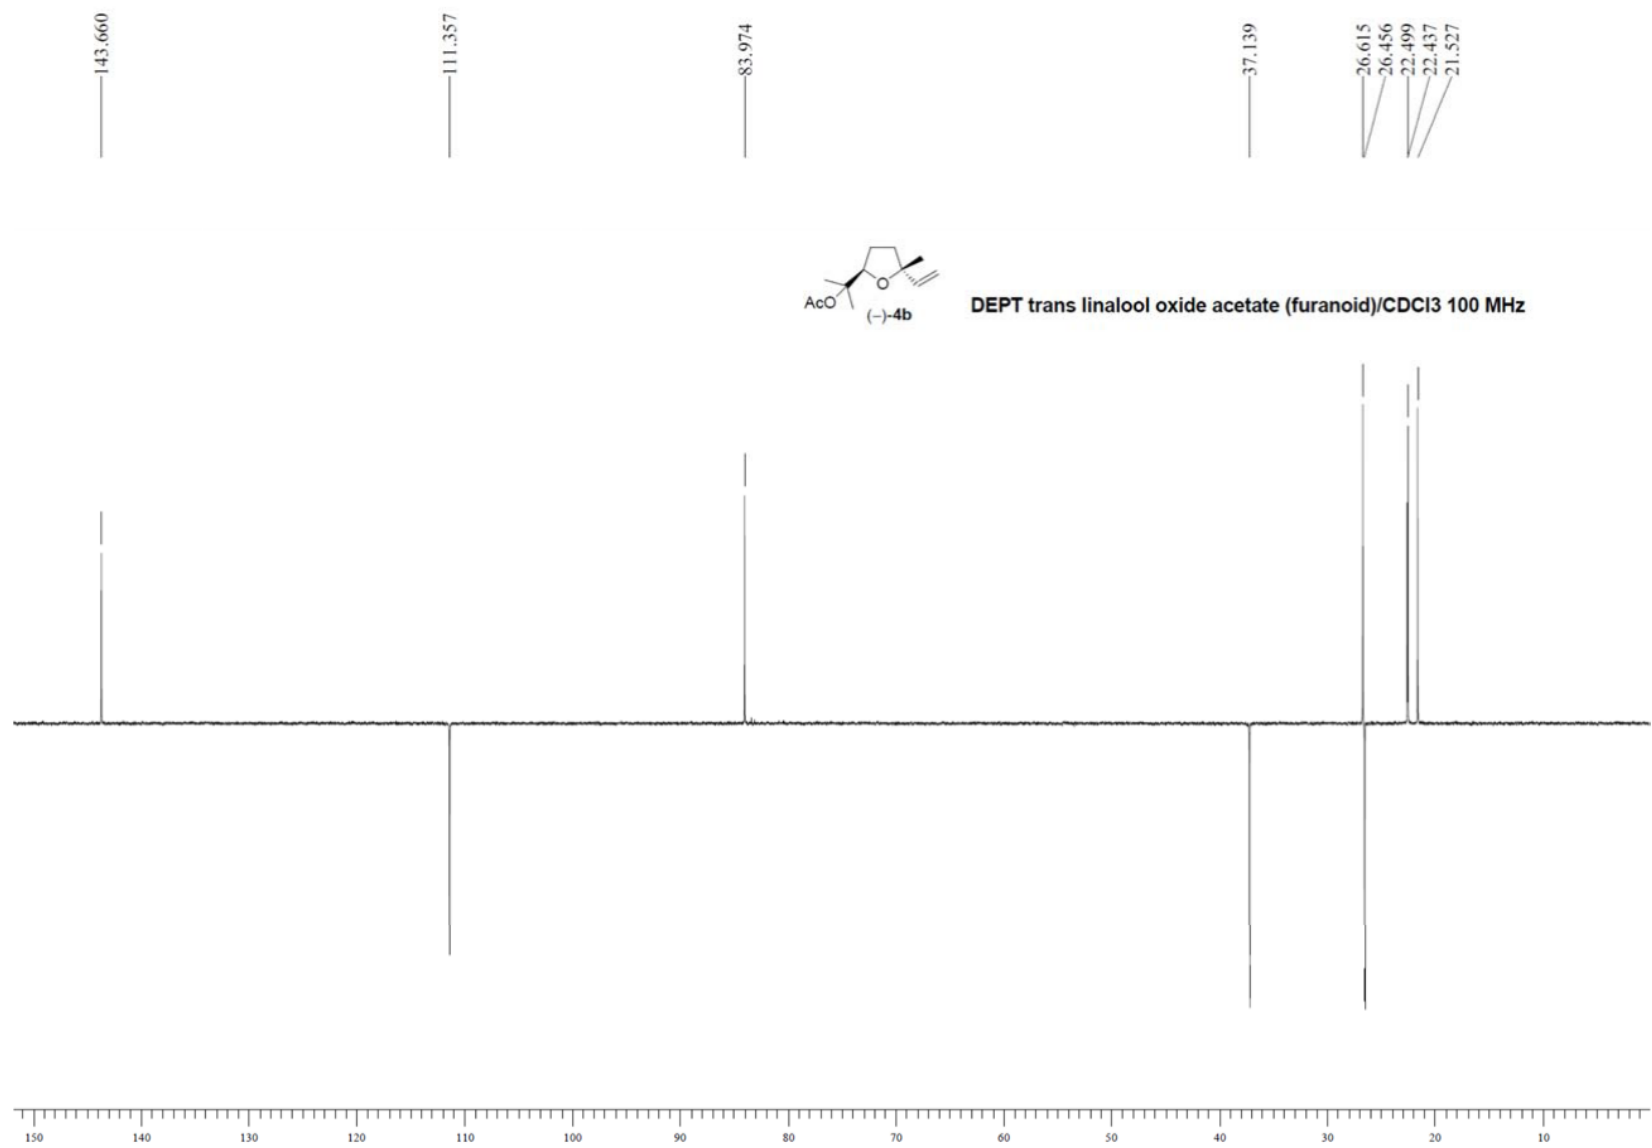

**Figure S18.** DEPT experiment of the *trans* linalool oxide acetate (furanoid).
